# Supplementary material for: Fluostatins M–Q Featuring a 6-5-6-6 Ring Skeleton and High Oxidized A-Rings from Marine Streptomyces sp. PKU-MA00045
Source: PubMed Central journal article supplement (PMC5867631; doi:10.3390/md16030087), 2018-03-09

**Fluostatins M-Q Featuring a 6-5-6-6 Ring Skeleton and High  
Oxidized A-rings from Marine *Streptomyces* sp. PKU-MA00045**

Jing Jin <sup>1</sup>, Xiaoyan Yang <sup>1</sup>, Tan Liu <sup>1</sup>, Hua Xiao <sup>1</sup>, Guiyang Wang <sup>1</sup>, Mengjie Zhou <sup>1</sup>, Fawang  
Liu <sup>1</sup>, Yingtao Zhang <sup>1</sup>, Dong Liu <sup>1</sup>, Minghua Chen <sup>2</sup>, Wei Cheng <sup>1</sup>, Donghui Yang <sup>1,\*</sup> and  
Ming Ma <sup>1,\*</sup>

<sup>1</sup> State Key Laboratory of Natural and Biomimetic Drugs, Department of Natural Medicines,  
School of Pharmaceutical Sciences, Peking University, 38 Xueyuan Road, Haidian District,  
Beijing 100191, China;

<sup>2</sup> Institute of Medicinal Biotechnology, Chinese Academy of Medical Sciences and Peking  
Union Medical College, 1# Tiantanxili, Beijing 100050, China

Jing Jin, Xiaoyan Yang and Tan Liu contributed equally

\*Correspondence: ydhui@bjmu.edu.cn; mma@bjmu.edu.cn

## Supplementary Materials

|                                                                                                                                                                                                   |        |
|---------------------------------------------------------------------------------------------------------------------------------------------------------------------------------------------------|--------|
| <b>Table S1.</b> The 12 “positive” strains and the homologues of their PCR products.                                                                                                              | S3     |
| <b>Table S2.</b> The deduced functions of genes from the <i>fluo</i> gene cluster and their homologues from the <i>fls</i> gene cluster.                                                          | S4-5   |
| <b>Figure S1.</b> The representative new aromatic polyketides discovered from marine actinomycetes.                                                                                               | S6     |
| <b>Figure S2.</b> The agarose gel electrophoresis analysis of the 12 “positive” PCR products.                                                                                                     | S7     |
| <b>Figure S3.</b> The phylogenetic analysis of strain PKU-MA00045.                                                                                                                                | S8     |
| <b>Figure S4-13.</b> The <sup>1</sup> H NMR, <sup>1</sup> H NMR (D <sub>2</sub> O added), APT, COSY, HSQC, HMBC, ROESY, ROESY (D <sub>2</sub> O added), MS, and IR spectra of compound <b>1</b> . | S9-18  |
| <b>Figure S14-21.</b> The <sup>1</sup> H NMR, <sup>13</sup> C NMR, COSY, HSQC, HMBC, ROESY, MS, and IR spectra of compound <b>2</b> .                                                             | S19-26 |
| <b>Figure S22-29.</b> The <sup>1</sup> H NMR, <sup>13</sup> C NMR, COSY, HSQC, HMBC, ROESY, MS, and IR spectra of compound <b>3</b> .                                                             | S27-34 |
| <b>Figure S30-37.</b> The <sup>1</sup> H NMR, APT, COSY, HSQC, HMBC, ROESY, MS, and IR spectra of compound <b>4</b> .                                                                             | S35-42 |
| <b>Figure S38-45.</b> The <sup>1</sup> H NMR, <sup>13</sup> C NMR, COSY, HSQC, HMBC, ROESY, MS, and IR spectra of compound <b>5</b> .                                                             | S43-50 |

**Table S1.** The 12 “positive” strains and the homologues of their PCR products. The right two columns show the identities and accession numbers of the highest homologues of the PCR products.

| Positive strains | Homologues of PCR products                   | Identities | Accession numbers of the homologues |
|------------------|----------------------------------------------|------------|-------------------------------------|
| PKU-MA00045      | beta-ketoacyl synthase                       | 97%        | WP_040253445                        |
| PKU-MA00046      | polyketide beta-ketoacyl synthase            | 98%        | WP_037760056                        |
| PKU-MA00115      | beta-ketoacyl synthase                       | 84%        | WP_030349268                        |
| PKU-MA00146      | polyketide beta-ketoacyl synthase            | 85%        | WP_017237281                        |
| PKU-MA00159      | type II polyketide synthase KSII             | 70%        | AAZ42180                            |
| PKU-MA00174      | beta-ketoacyl synthase                       | 74%        | WP_026237418                        |
| PKU-MA00175      | beta-ketoacyl synthase                       | 84%        | WP_030349268                        |
| PKU-MA00181      | polyketide beta-ketoacyl synthase            | 97%        | WP_013155268                        |
| PKU-MA00192      | actinorhodinpolyketide beta-ketoacylsynthase | 97%        | WP_018806194                        |
| PKU-MA00208      | beta-ketoacyl synthase                       | 66%        | WP_030028306                        |
| PKU-MA00218      | beta-ketoacyl synthase                       | 84%        | WP_030349268                        |
| PKU-MA00219      | beta-ketoacyl synthase                       | 100%       | WP_029127731                        |

**Table S2.** The deduced functions of genes from the *fluo* gene cluster and their homologues from the *fls* gene cluster.

| Genes         | Annotation based on BLAST |                                                           |                                         |                            | Homologues from <i>fls</i> gene cluster |            |
|---------------|---------------------------|-----------------------------------------------------------|-----------------------------------------|----------------------------|-----------------------------------------|------------|
|               | Numbers of amino acids    | Proposed functions                                        | Accession numbers of closest homologues | Identities with homologues | Homologues                              | Identities |
| <i>fluo1</i>  | 155                       | ATP-binding protein                                       | <a href="#">WP_052482552.1</a>          | 100%                       |                                         |            |
| <i>fluo2</i>  | 202                       | TetR/AcrR family transcriptional regulator                | <a href="#">WP_052482553.1</a>          | 100%                       |                                         |            |
| <i>fluo3</i>  | 138                       | TIGR03618 family F420-dependent PPOX class oxidoreductase | <a href="#">WP_040258142.1</a>          | 100%                       | <i>flsL</i>                             | 61.59%     |
| <i>fluo4</i>  | 149                       | nuclear transport factor 2 family protein                 | <a href="#">WP_040253434.1</a>          | 99%                        |                                         |            |
| <i>fluo5</i>  | 471                       | monooxygenase                                             | <a href="#">WP_040253436.1</a>          | 99%                        | <i>flsO1</i>                            | 61.17%     |
| <i>fluo6</i>  | 229                       | Anthrone monooxygenase                                    | <a href="#">WP_040253438.1</a>          | 99%                        | <i>flsG</i>                             | 54.01%     |
| <i>fluo7</i>  | 495                       | bilirubin oxidase                                         | <a href="#">WP_054238927.1</a>          | 60%                        |                                         |            |
| <i>fluo8</i>  | 107                       | TcmI family type II polyketide cyclase                    | <a href="#">WP_040253440.1</a>          | 99%                        | <i>flsI</i>                             | 85.32%     |
| <i>fluo9</i>  | 423                       | ketosynthase                                              | <a href="#">BAA92280.1</a>              | 100%                       | <i>flsA</i>                             | 81.56%     |
| <i>fluo10</i> | 404                       | ketosynthase chain-length factor                          | <a href="#">WP_040253445.1</a>          | 100%                       | <i>flsB</i>                             | 67.48%     |
| <i>fluo11</i> | 89                        | acyl carrier protein                                      | <a href="#">WP_040253447.1</a>          | 100%                       | <i>flsC</i>                             | 56.04%     |
| <i>fluo12</i> | 264                       | KR domain-containing protein                              | <a href="#">WP_040253449.1</a>          | 100%                       | <i>flsE</i>                             | 78.41%     |
| <i>fluo13</i> | 313                       | cyclase                                                   | <a href="#">WP_040253451.1</a>          | 100%                       | <i>flsD</i>                             | 64.15%     |
| <i>fluo14</i> | 485                       | oxidoreductase                                            | <a href="#">WP_040253452.1</a>          | 99%                        | <i>flsO3</i>                            | 58.76%     |
| <i>fluo15</i> | 506                       | monooxygenase                                             | <a href="#">WP_040253455.1</a>          | 99%                        | <i>flsO2</i>                            | 65.75%     |
| <i>fluo16</i> | 313                       | thioesterase                                              | <a href="#">WP_052482554.1</a>          | 99%                        |                                         |            |
| <i>fluo17</i> | 224                       | JadM phosphopantetheinyl transferase-like protein         | <a href="#">AJE85506.1</a>              | 99%                        |                                         |            |
| <i>fluo18</i> | 524                       | acyl-CoA carboxylase subunit beta                         | <a href="#">WP_052482556.1</a>          | 99%                        | <i>flsF</i>                             | 78.82%     |
| <i>fluo19</i> | 96                        | acyl-CoA carboxylase subunit epsilon                      | <a href="#">WP_052482557.1</a>          | 95%                        |                                         |            |

|               |     |                                                 |                                |      |              |        |
|---------------|-----|-------------------------------------------------|--------------------------------|------|--------------|--------|
| <i>fluo20</i> | 261 | hypothetical protein SLNHY_5121                 | <a href="#">AOU79812.1</a>     | 100% |              |        |
| <i>fluo21</i> | 111 | 4Fe-4S ferredoxin                               | <a href="#">WP_040253458.1</a> | 100% | <i>flsV</i>  | 54.69% |
| <i>fluo22</i> | 639 | hypothetical protein                            | <a href="#">WP_040253460.1</a> | 99%  | <i>flsU2</i> | 57.43% |
| <i>fluo23</i> | 479 | amidase                                         | <a href="#">WP_078845181.1</a> | 99%  | <i>flsN3</i> | 63.05% |
| <i>fluo24</i> | 503 | glutamine synthetase                            | <a href="#">WP_040253462.1</a> | 99%  | <i>flsN4</i> | 63.35% |
| <i>fluo25</i> | 428 | adenylosuccinate lyase                          | <a href="#">WP_040253465.1</a> | 99%  | <i>flsS</i>  | 73.60% |
| <i>fluo26</i> | 134 | N-acetyltransferase                             | <a href="#">WP_040253467.1</a> | 99%  | <i>flsT</i>  | 64.93% |
| <i>fluo27</i> | 261 | DNA-binding response regulator                  | <a href="#">WP_078845182.1</a> | 100% | <i>flsR1</i> | 51.52% |
| <i>fluo28</i> | 298 | DNA-directed RNA polymerase sigma-70 factor     | <a href="#">WP_040253470.1</a> | 99%  |              |        |
| <i>fluo29</i> | 339 | transcriptional regulator protein               | <a href="#">AJE85519.1</a>     | 99%  | <i>flsR2</i> | 41.55% |
| <i>fluo30</i> | 388 | myo-inositol-1-phosphate synthase               | <a href="#">WP_052482559.1</a> | 99%  |              |        |
| <i>fluo31</i> | 256 | prenyltransferase UbiA                          | <a href="#">WP_040253473.1</a> | 99%  |              |        |
| <i>fluo32</i> | 315 | xylose isomerase                                | <a href="#">WP_078845184.1</a> | 99%  |              |        |
| <i>fluo33</i> | 139 | hypothetical protein                            | <a href="#">WP_052483226.1</a> | 100% |              |        |
| <i>fluo34</i> | 282 | hydrolase TatD                                  | <a href="#">WP_040253475.1</a> | 99%  |              |        |
| <i>fluo35</i> | 389 | xylose isomerase                                | <a href="#">WP_040253477.1</a> | 99%  |              |        |
| <i>fluo36</i> | 466 | alkaline phosphatase family protein             | <a href="#">WP_040253479.1</a> | 99%  |              |        |
| <i>fluo37</i> | 184 | GNAT family N-acetyltransferase                 | <a href="#">WP_040253481.1</a> | 98%  |              |        |
| <i>fluo38</i> | 195 | TetR family transcriptional regulator           | <a href="#">WP_052482560.1</a> | 98%  |              |        |
| <i>fluo39</i> | 362 | hydroxyneurosporene methyltransferase           | <a href="#">WP_078845185.1</a> | 99%  | <i>flsM</i>  | 53.59% |
| <i>fluo40</i> | 433 | ScyD/ScyE family protein                        | <a href="#">WP_040253483.1</a> | 99%  |              |        |
| <i>fluo41</i> | 194 | cupin domain-containing protein                 | <a href="#">WP_078845186.1</a> | 100% | <i>flsK</i>  | 61.34% |
| <i>fluo42</i> | 620 | drug resistance transporter EmrB/QacA subfamily | <a href="#">AJE85534.1</a>     | 99%  |              |        |
| <i>fluo43</i> | 161 | hypothetical protein                            | <a href="#">WP_040253488.1</a> | 100% |              |        |

**Figure S1.** The representative new aromatic polyketides discovered from marine actinomycetes.

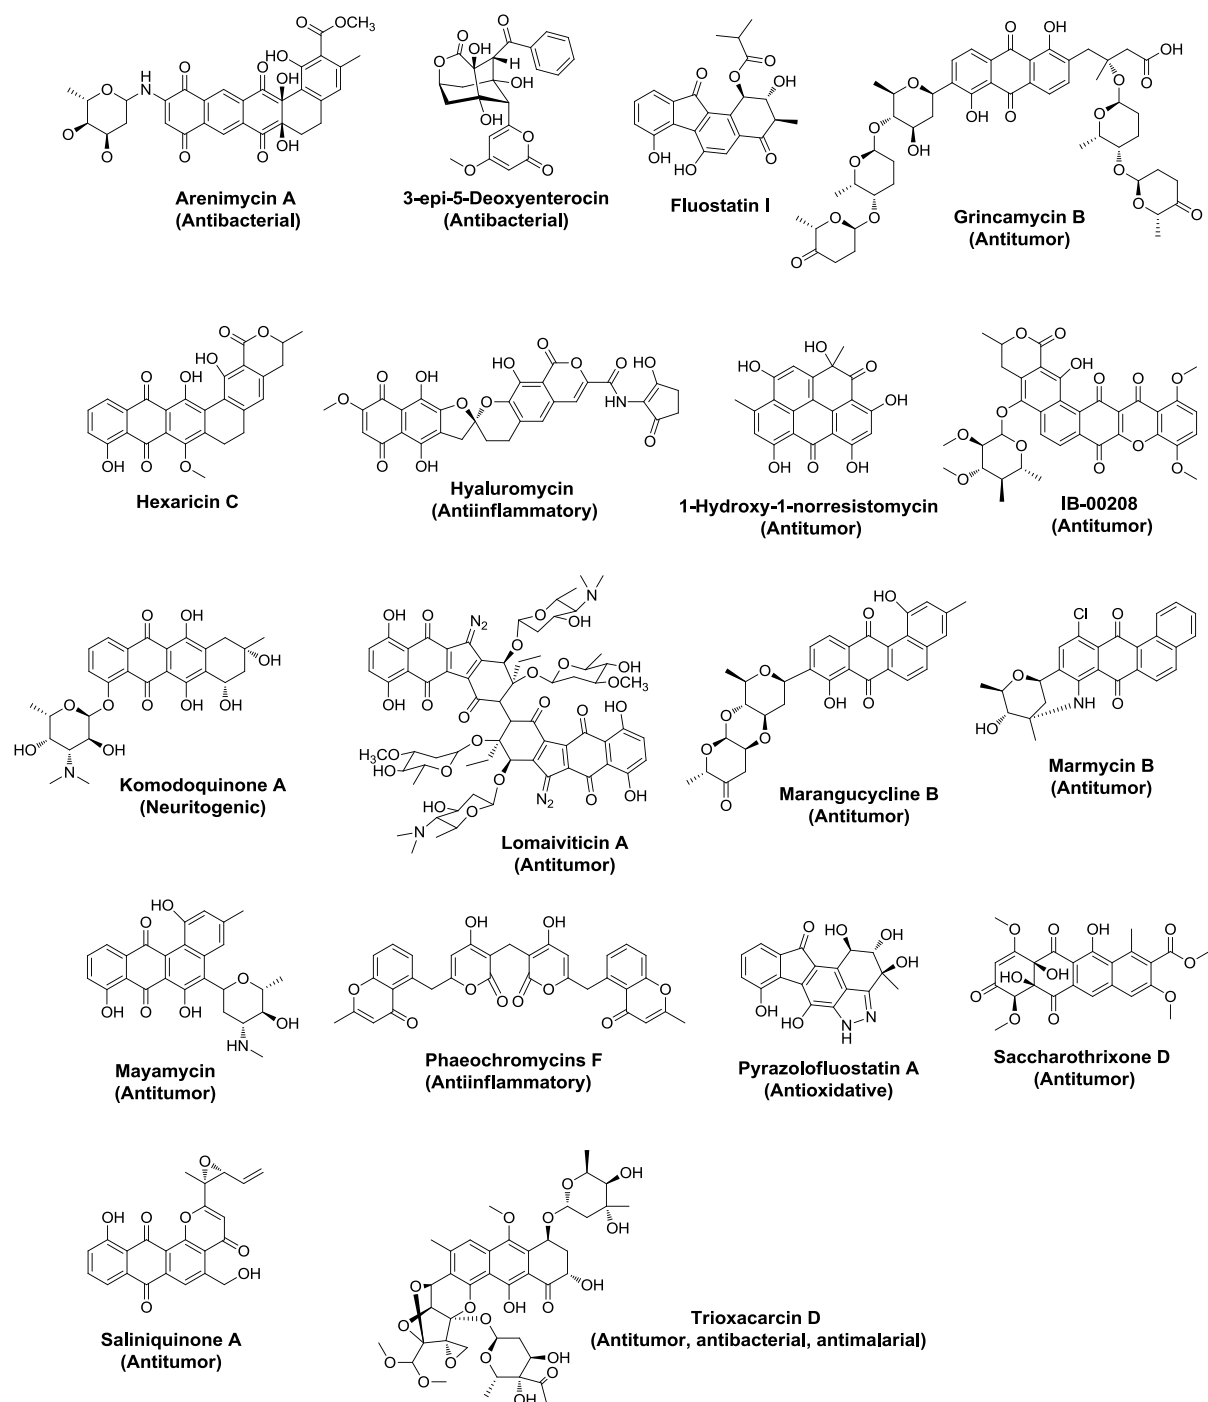

**Figure S2.** The agarose gel electrophoresis analysis of the 12 “positive” PCR products. The bands for expected PCR products were highlighted with a red box.

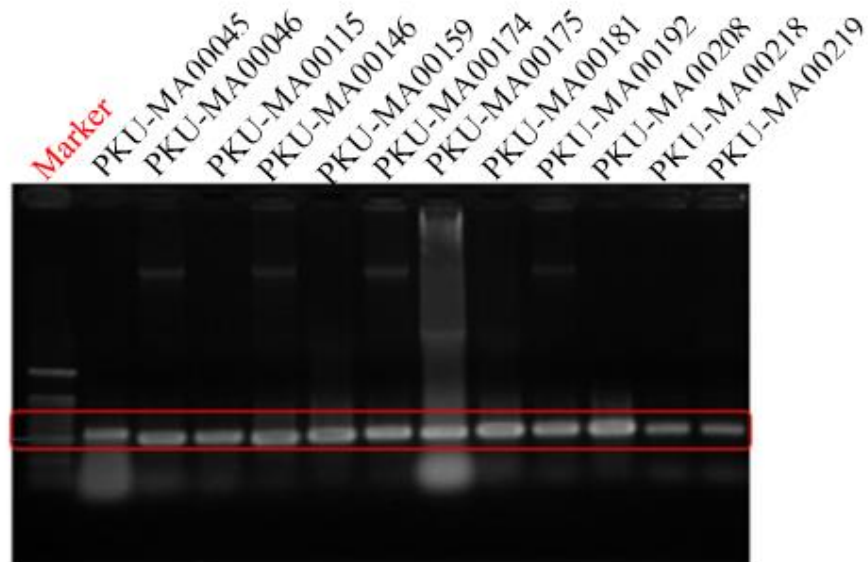

**Figure S3.** The phylogenetic analysis of strain PKU-MA00045 (labeled in red) based on comparison of 16S rRNA sequences. The sequence of 16S rRNA of *Streptacidiphilus hamsterleyensis* HSCA14 was used as an outgroup. The GenBank accession numbers are shown in parentheses.

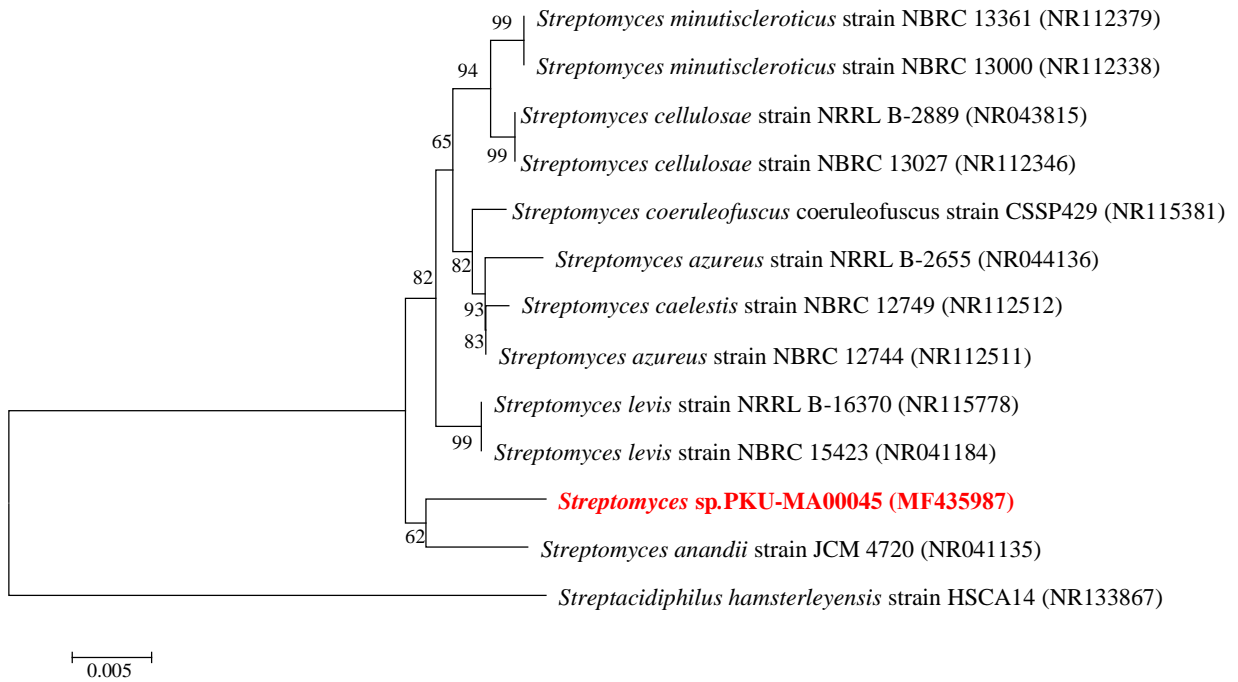



Figure S4. The  $^1\text{H}$  NMR (600 MHz) spectrum of compound **1** in  $\text{DMSO-}d_6$

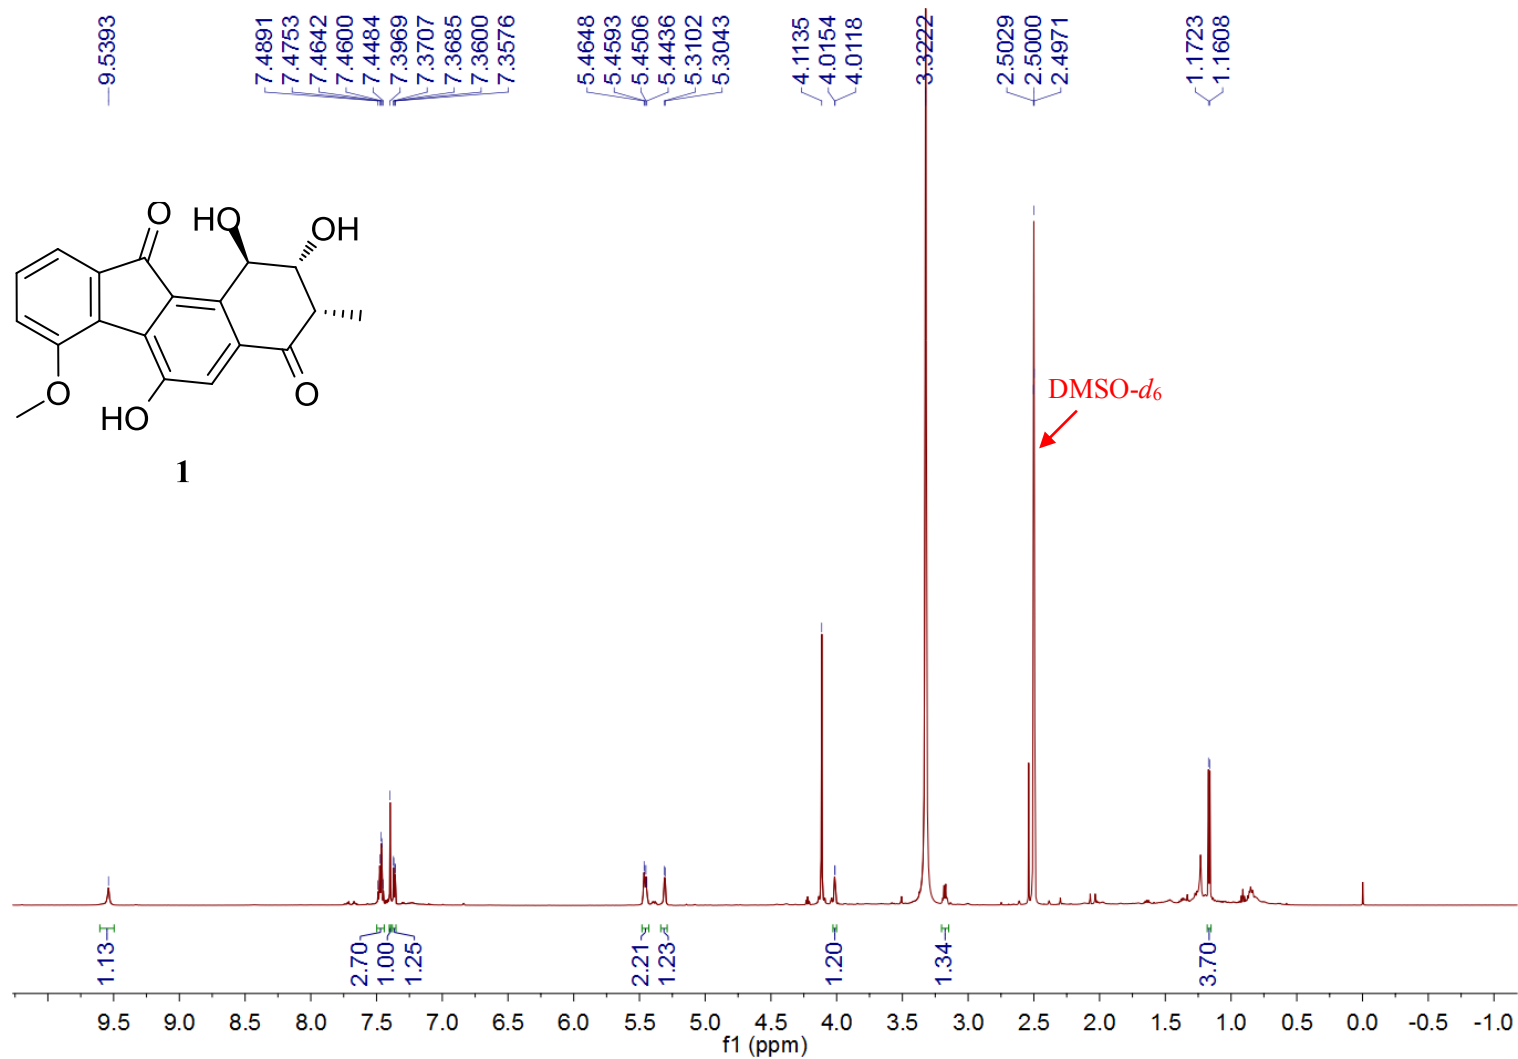

Figure S5. The  $^1\text{H}$  NMR (600 MHz) spectrum of compound **1** in  $\text{DMSO-}d_6$  ( $\text{D}_2\text{O}$  added)

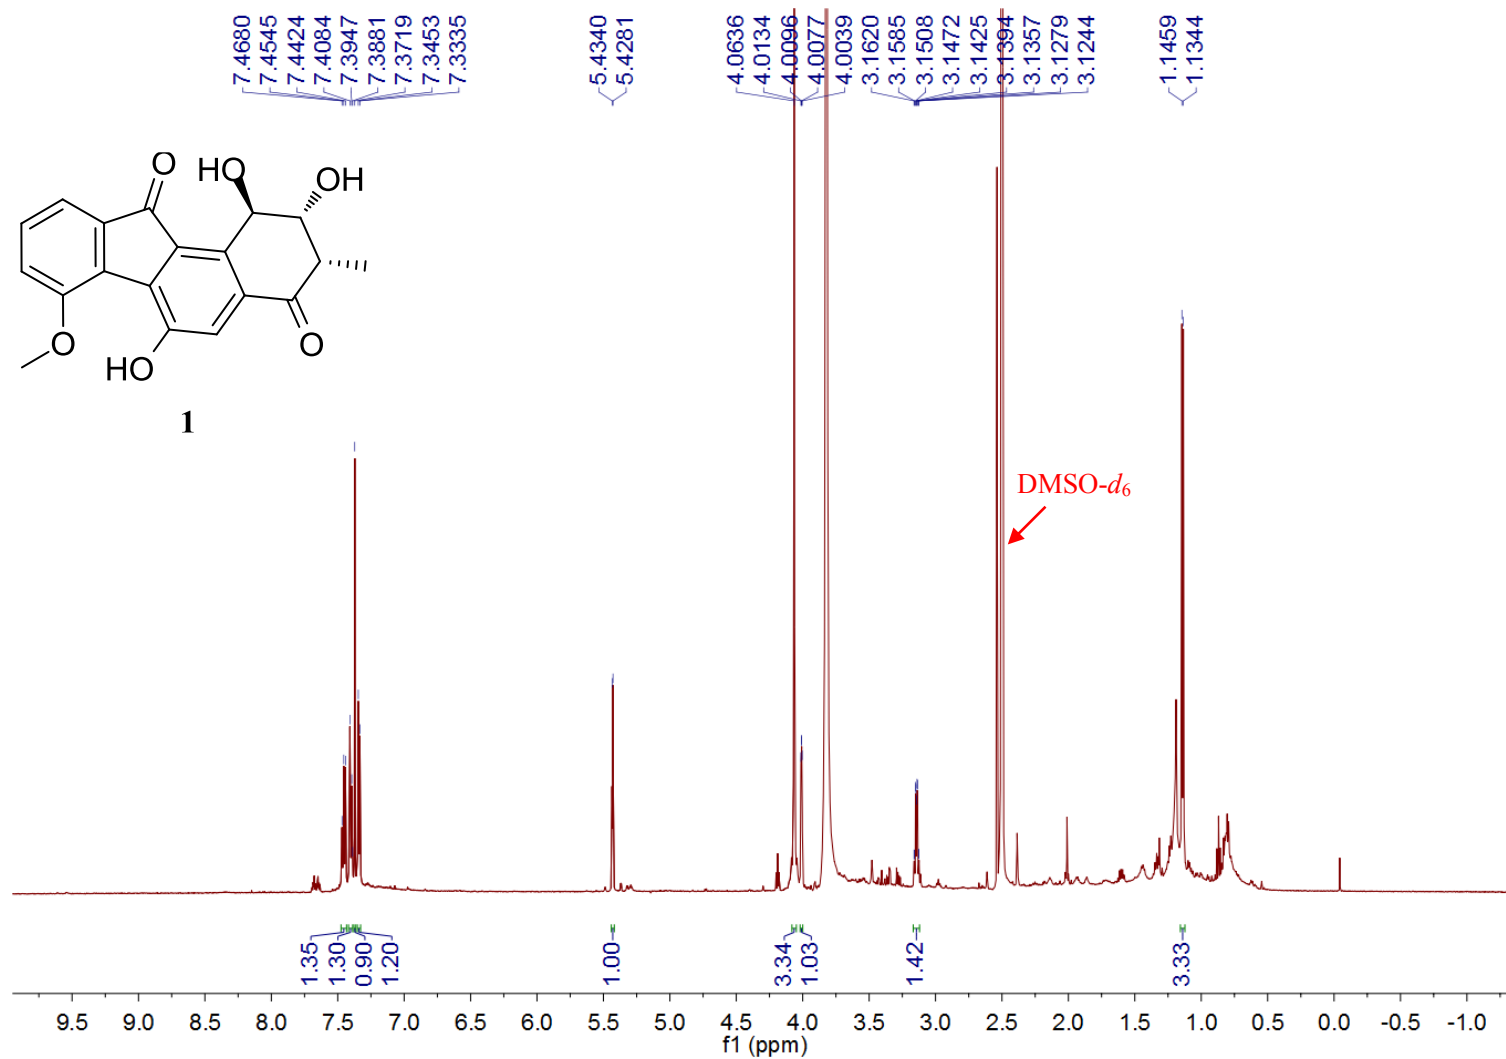

Figure S6. The APT (150 MHz) spectrum of compound **1** in DMSO-*d*<sub>6</sub>

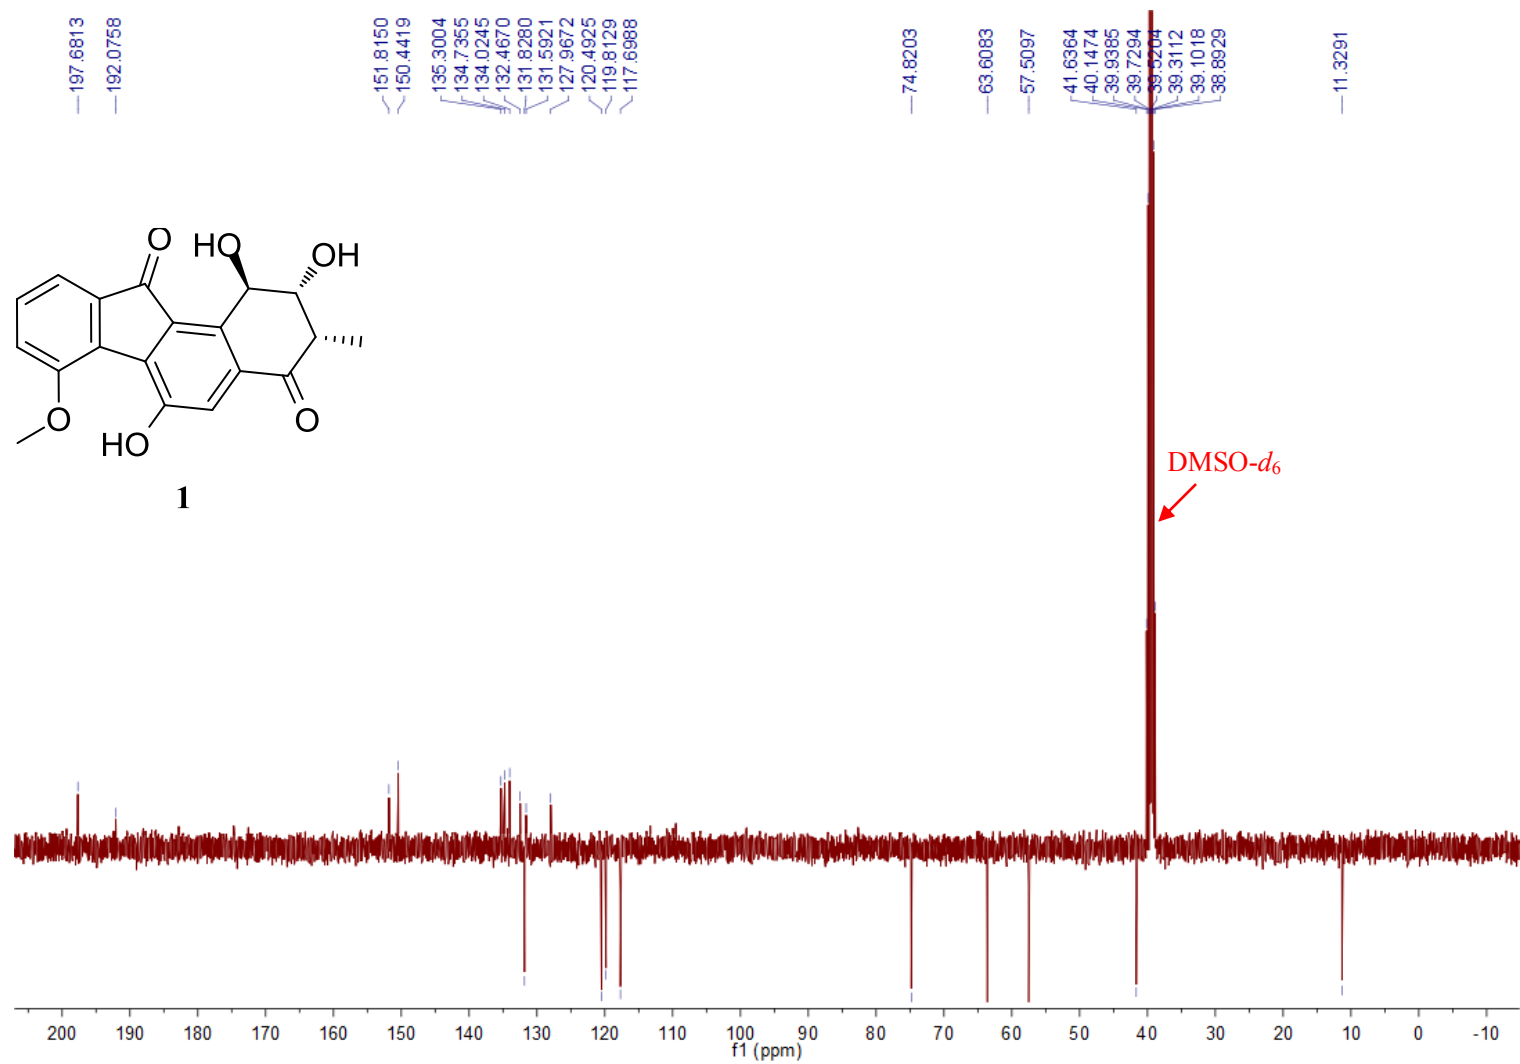

Figure S7. The COSY spectrum of compound **1** in DMSO- $d_6$

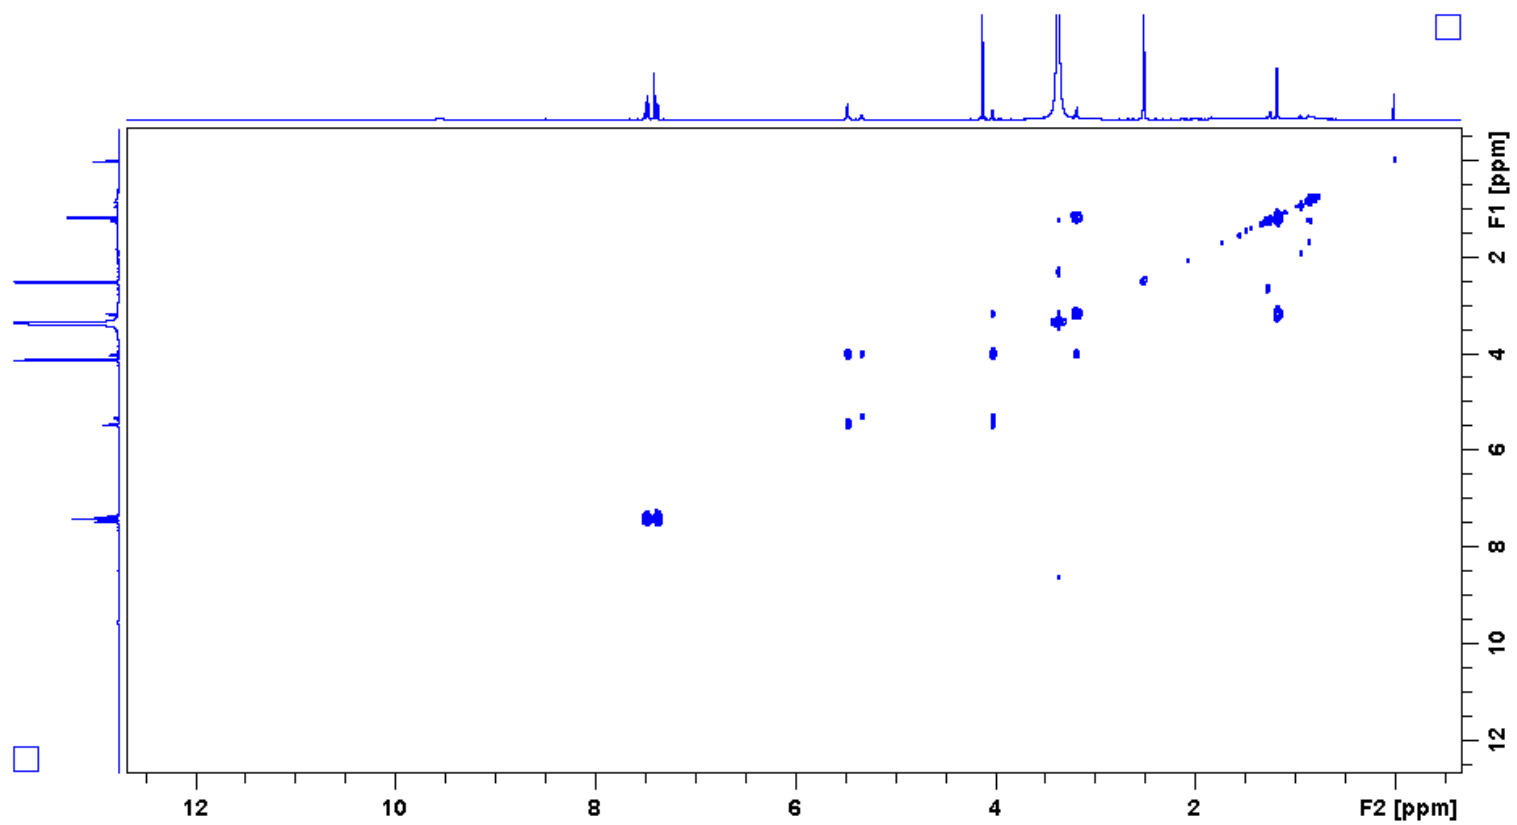

**Figure S8.** The HSQC spectrum of compound **1** in DMSO-*d*<sub>6</sub>

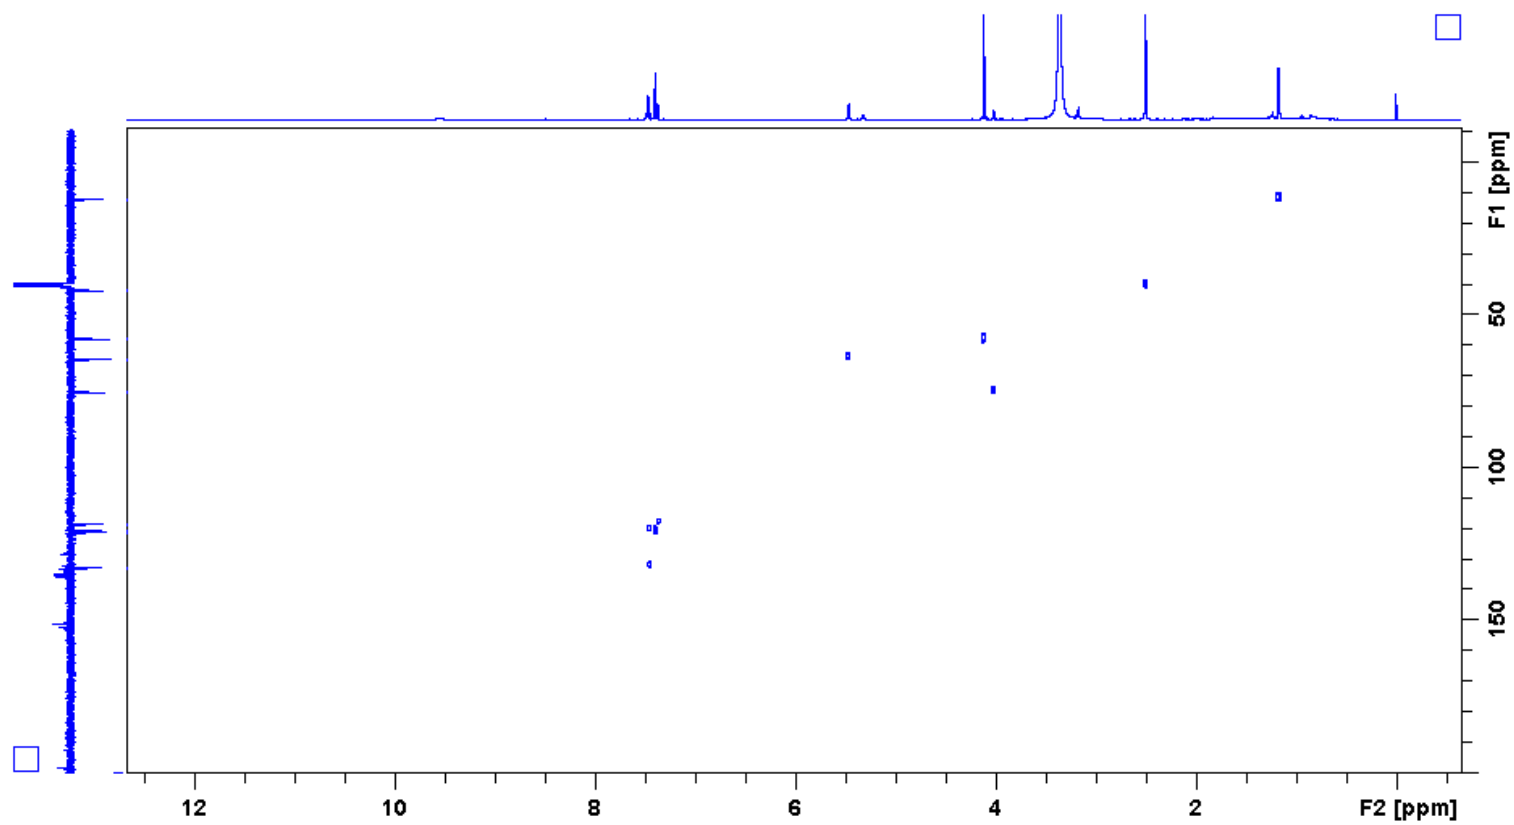

Figure S9. The HMBC spectrum of compound **1** in DMSO-*d*<sub>6</sub>

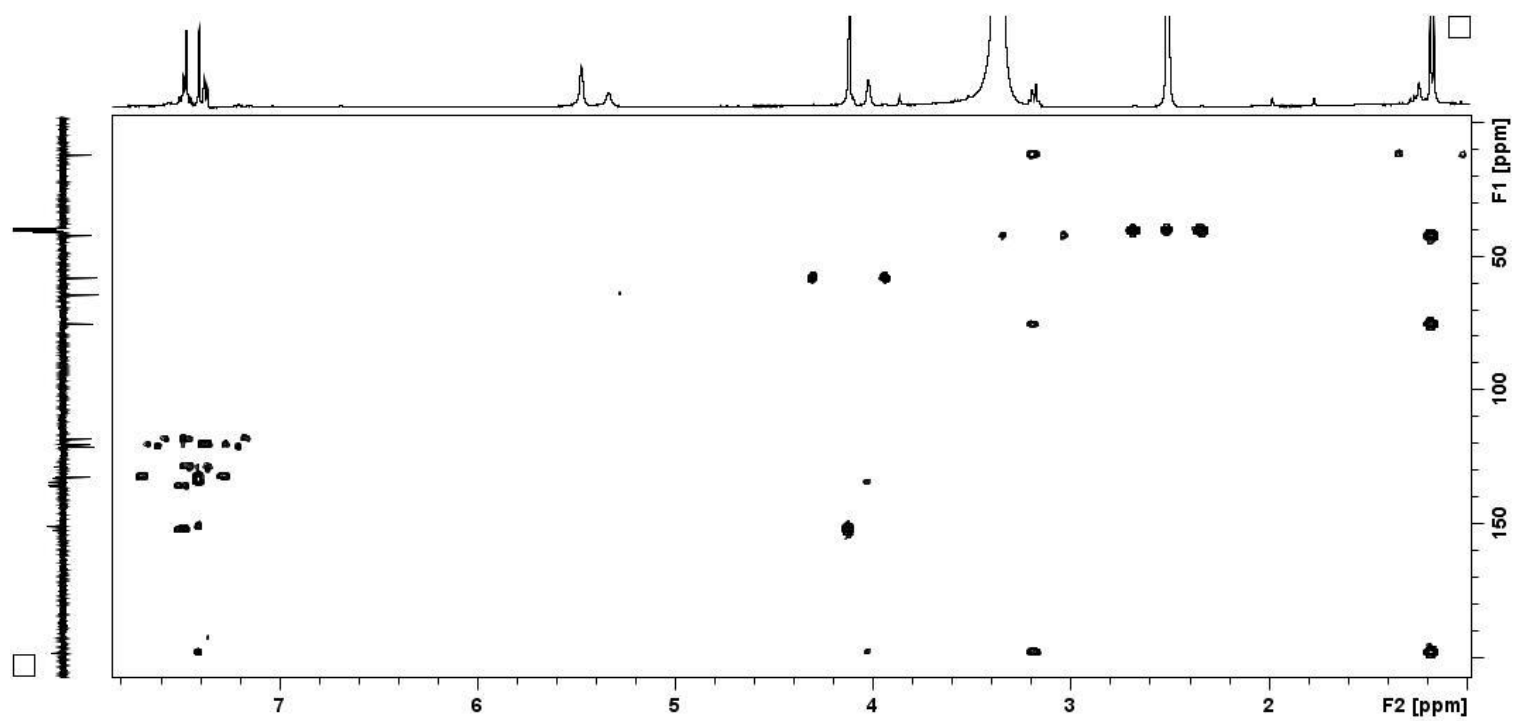

Figure S10. The ROESY spectrum of compound **1** in DMSO- $d_6$

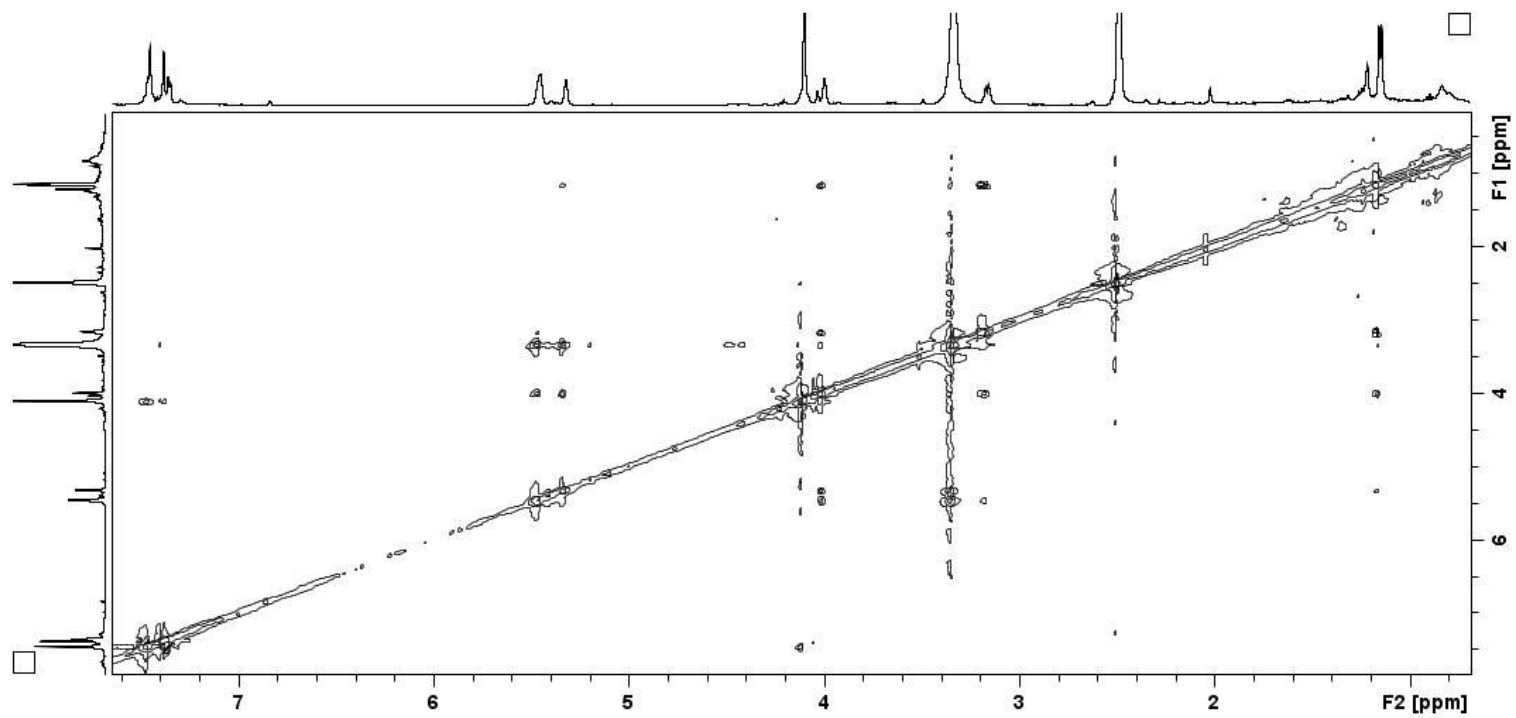

**Figure S11.** The ROESY spectrum of compound **1** in DMSO-*d*<sub>6</sub> (D<sub>2</sub>O added)

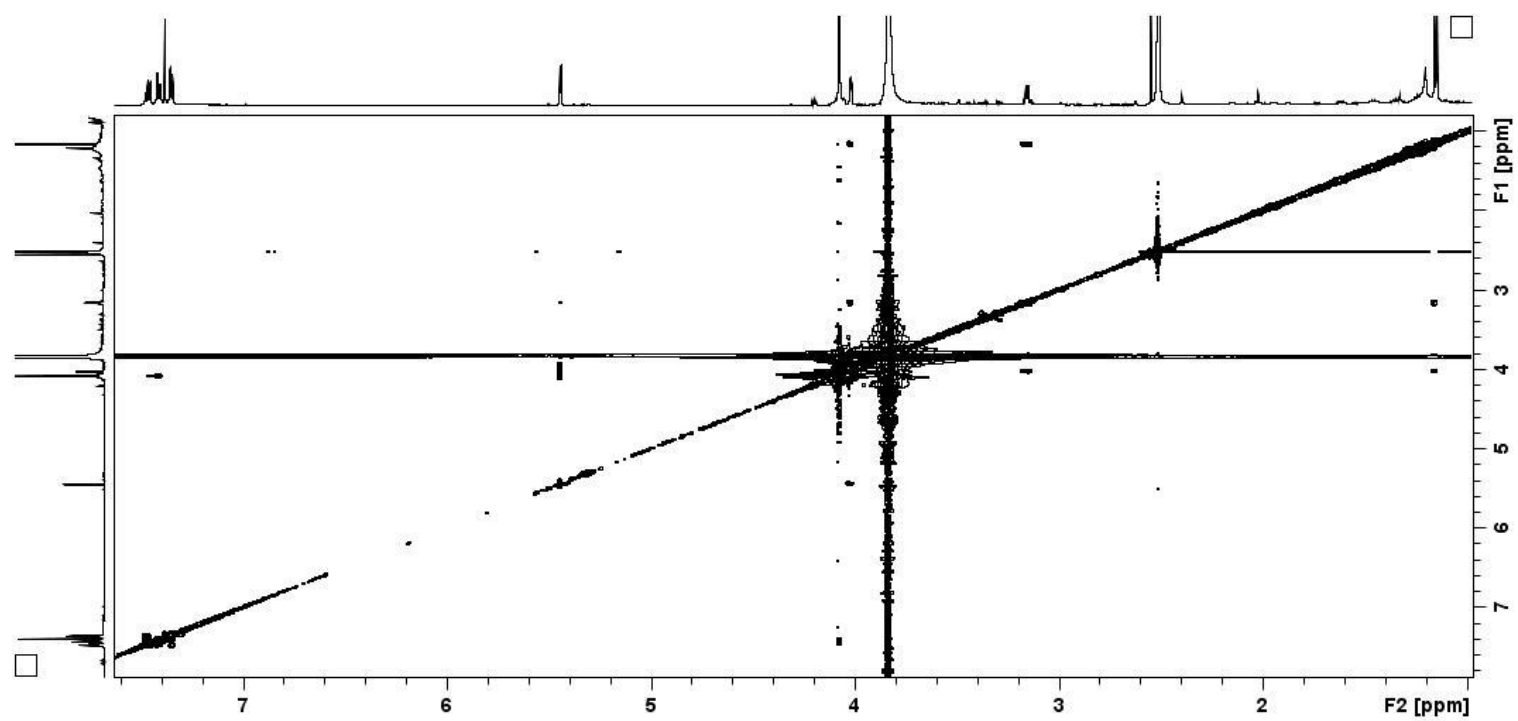



**Figure S12.** The HRESIMS spectrum of compound **1**

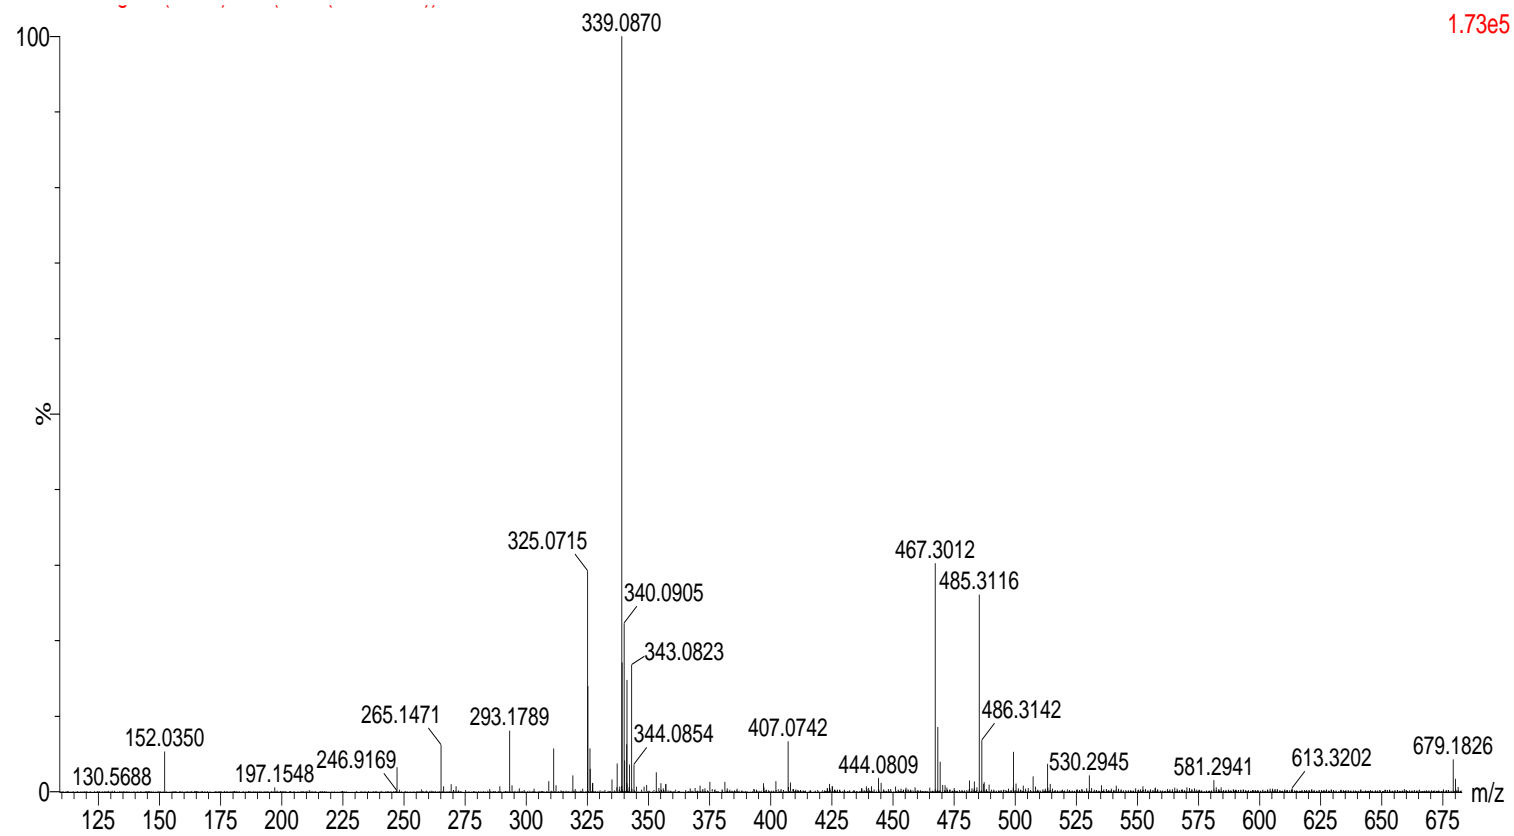

Figure S13. The IR spectrum of compound 1

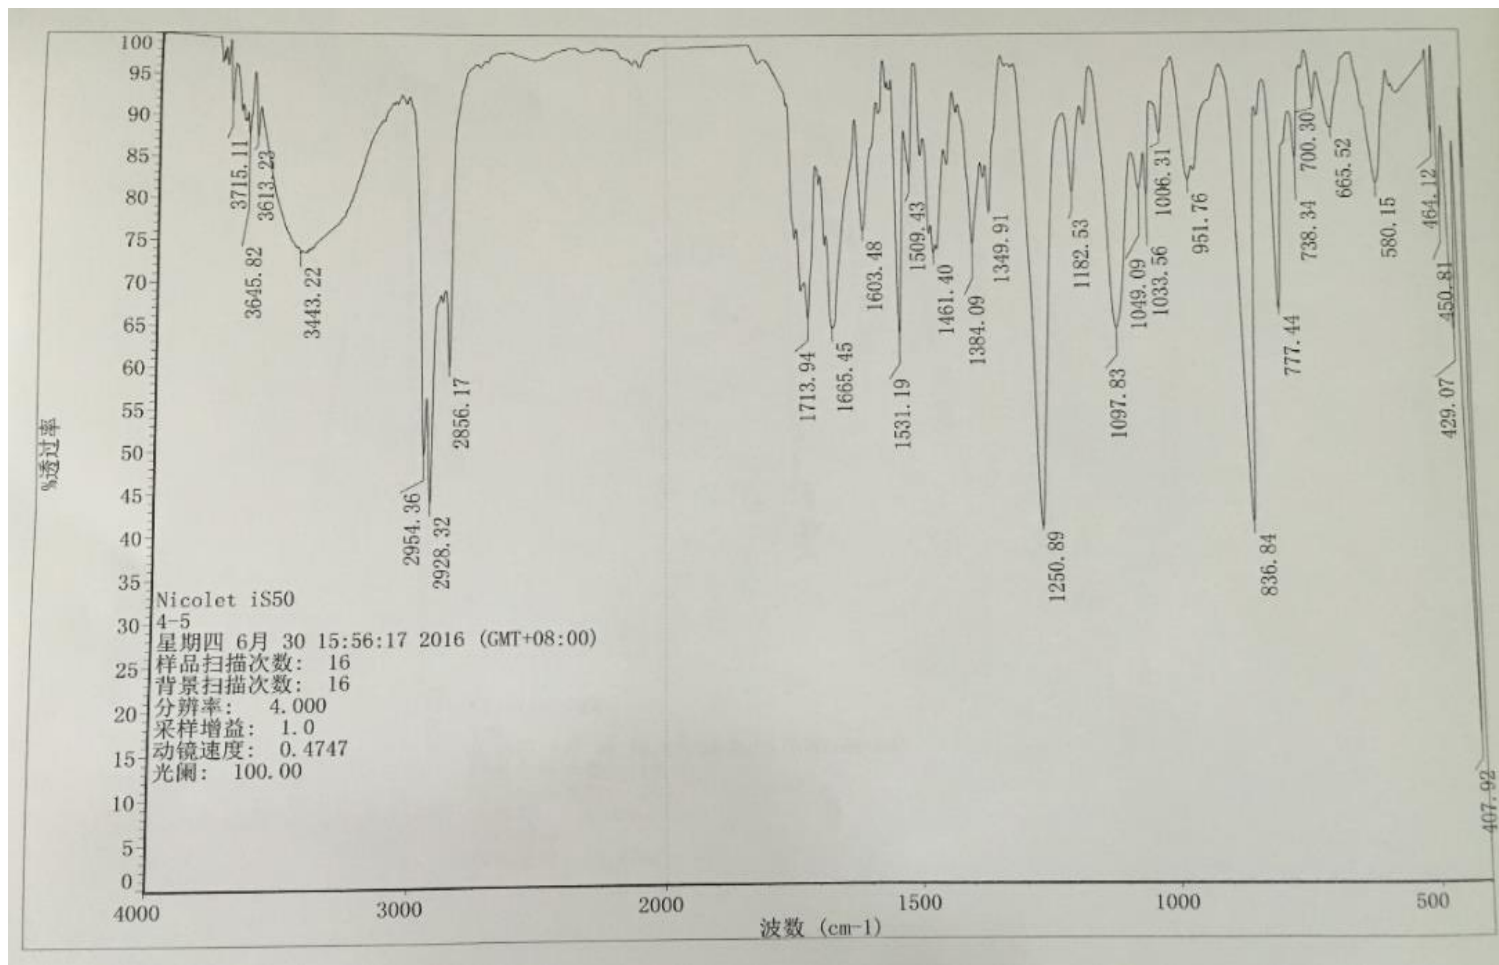

Figure S14. The  $^1\text{H}$  NMR (600 MHz) spectrum of compound **2** in  $\text{DMSO-}d_6$

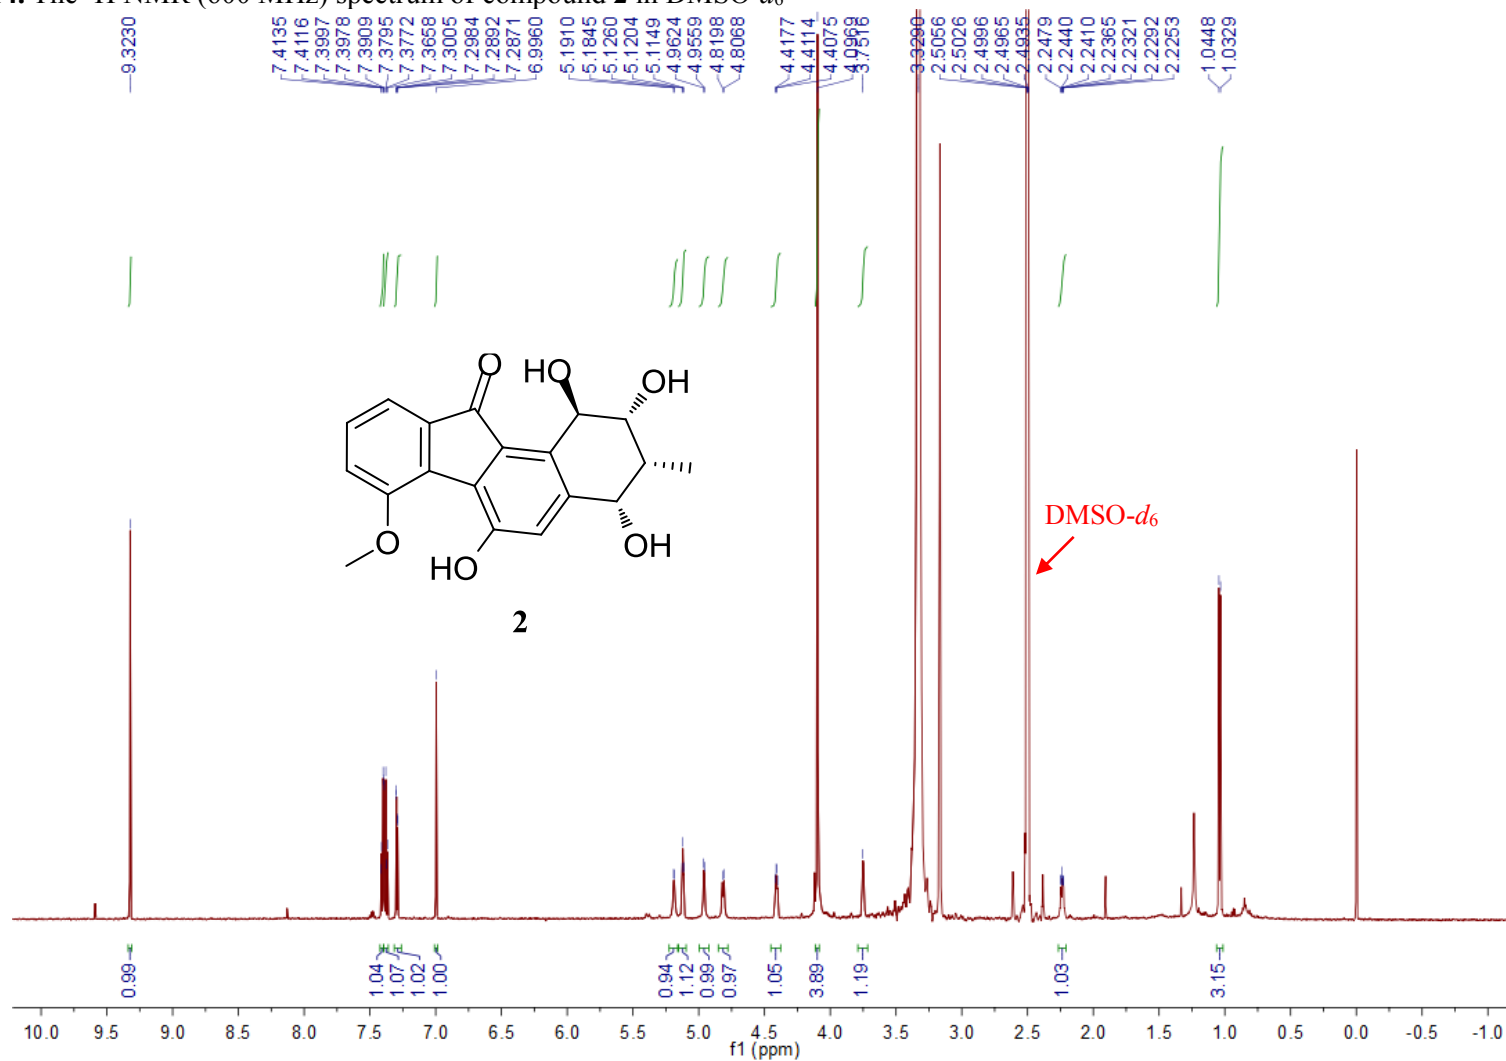

**Figure S15.** The  $^{13}\text{C}$  NMR (150 MHz) spectrum of compound **2** in  $\text{DMSO-}d_6$

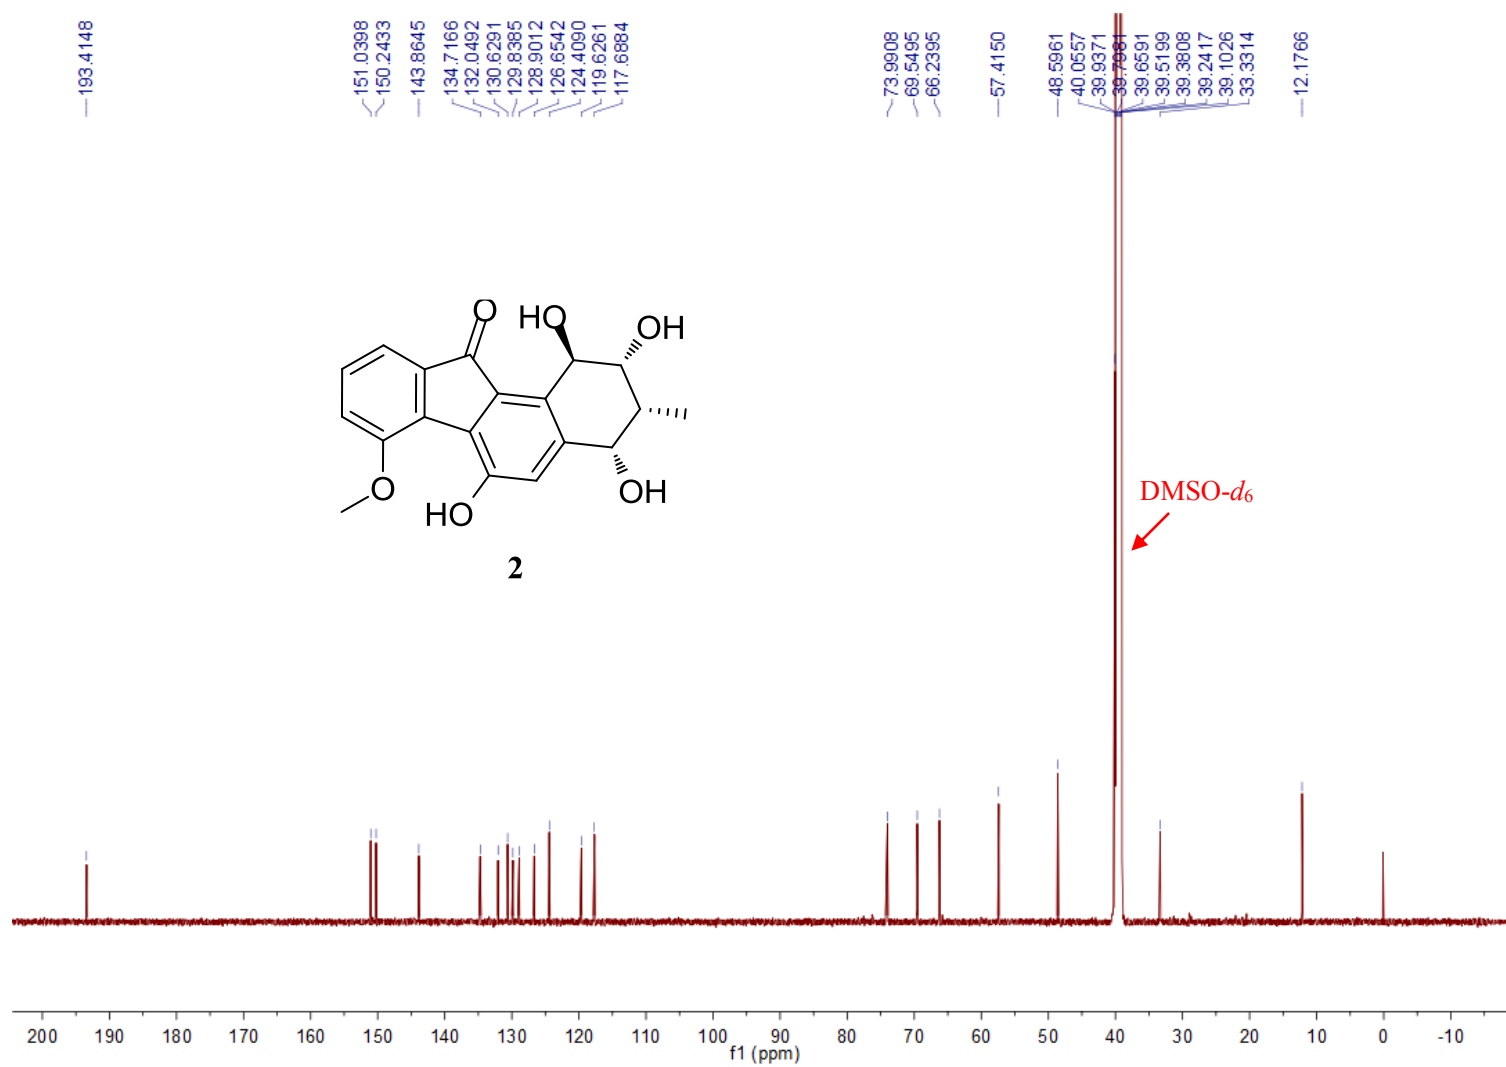

**Figure S16.** The COSY spectrum of compound **2** in DMSO-*d*<sub>6</sub>

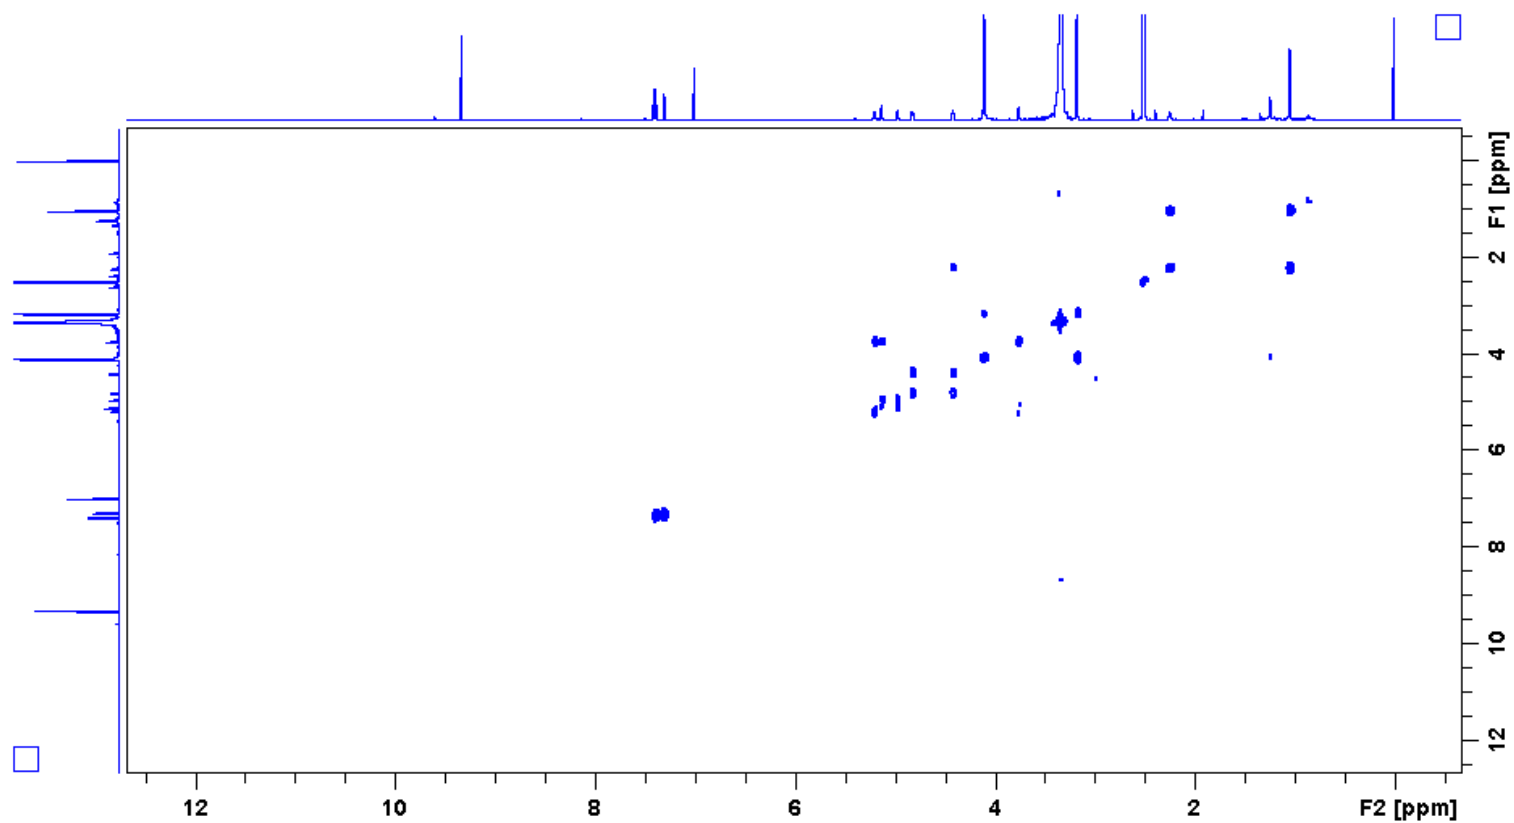

**Figure S17.** The HSQC spectrum of compound **2** in DMSO-*d*<sub>6</sub>

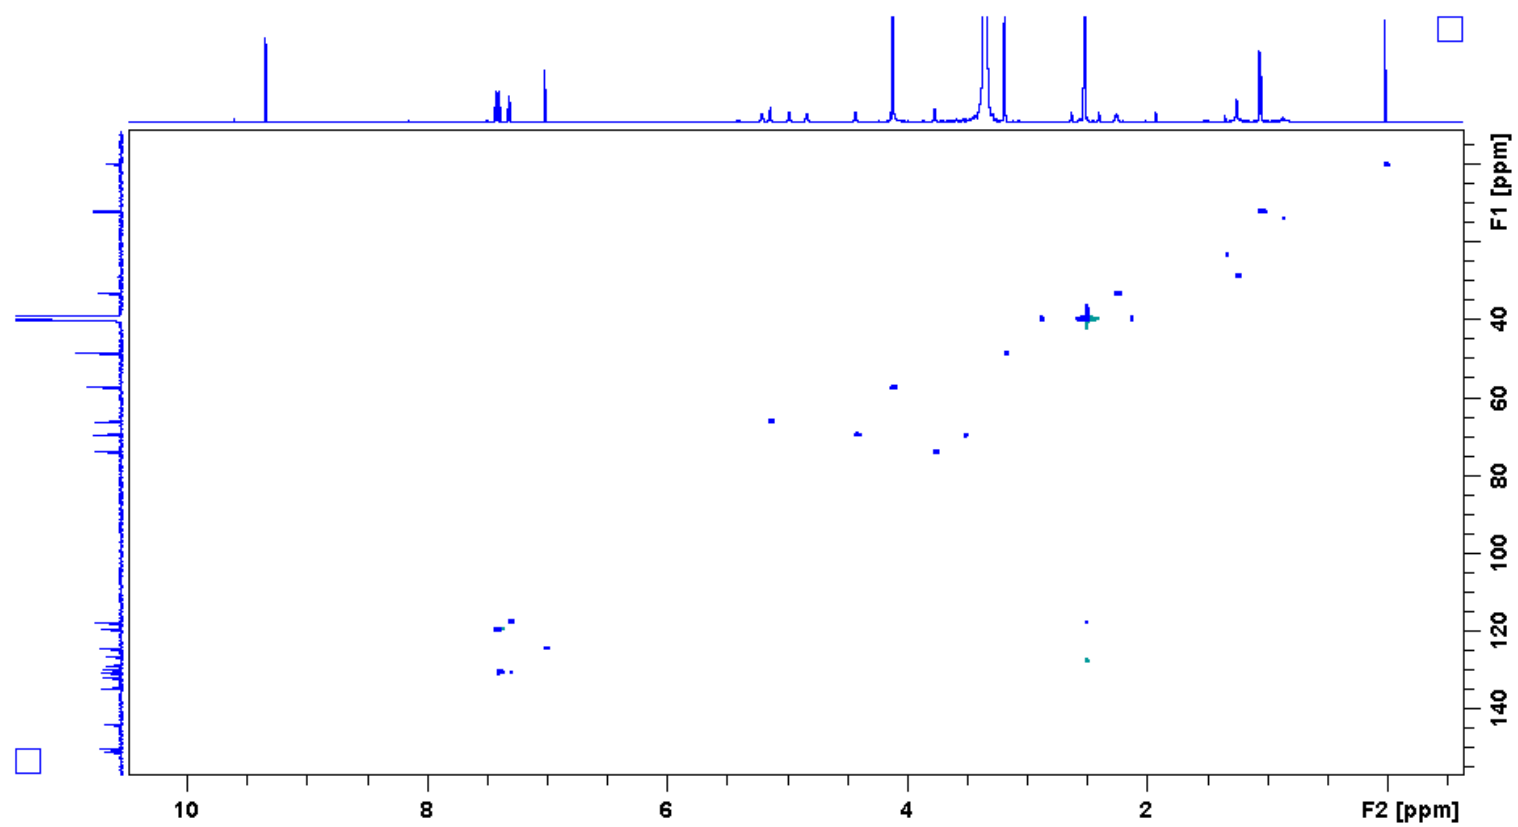

**Figure S18.** The HMBC spectrum of compound **2** in DMSO-*d*<sub>6</sub>

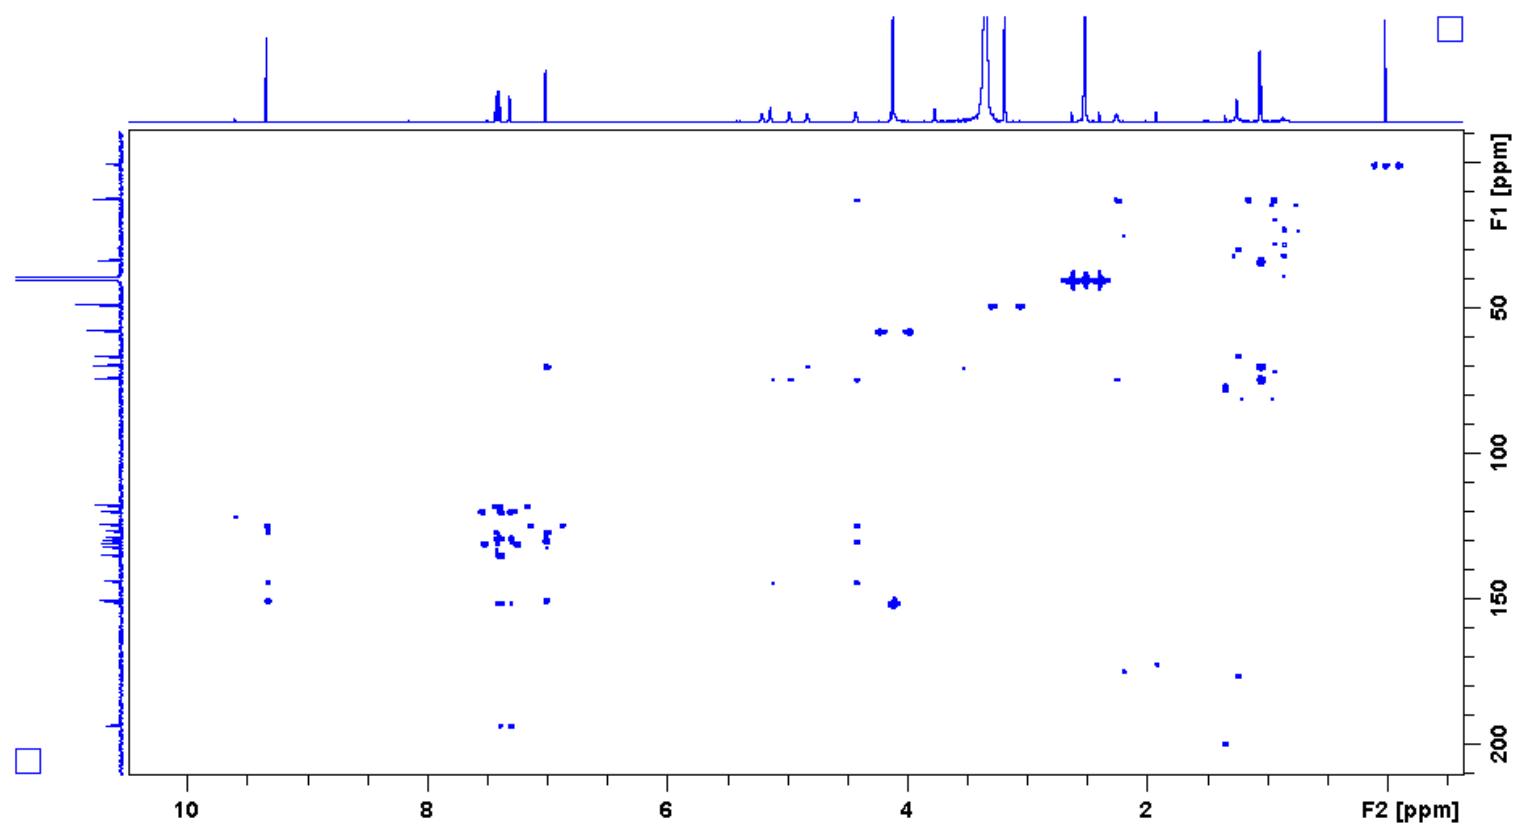

**Figure S19.** The ROESY spectrum of compound **2** in DMSO-*d*<sub>6</sub>

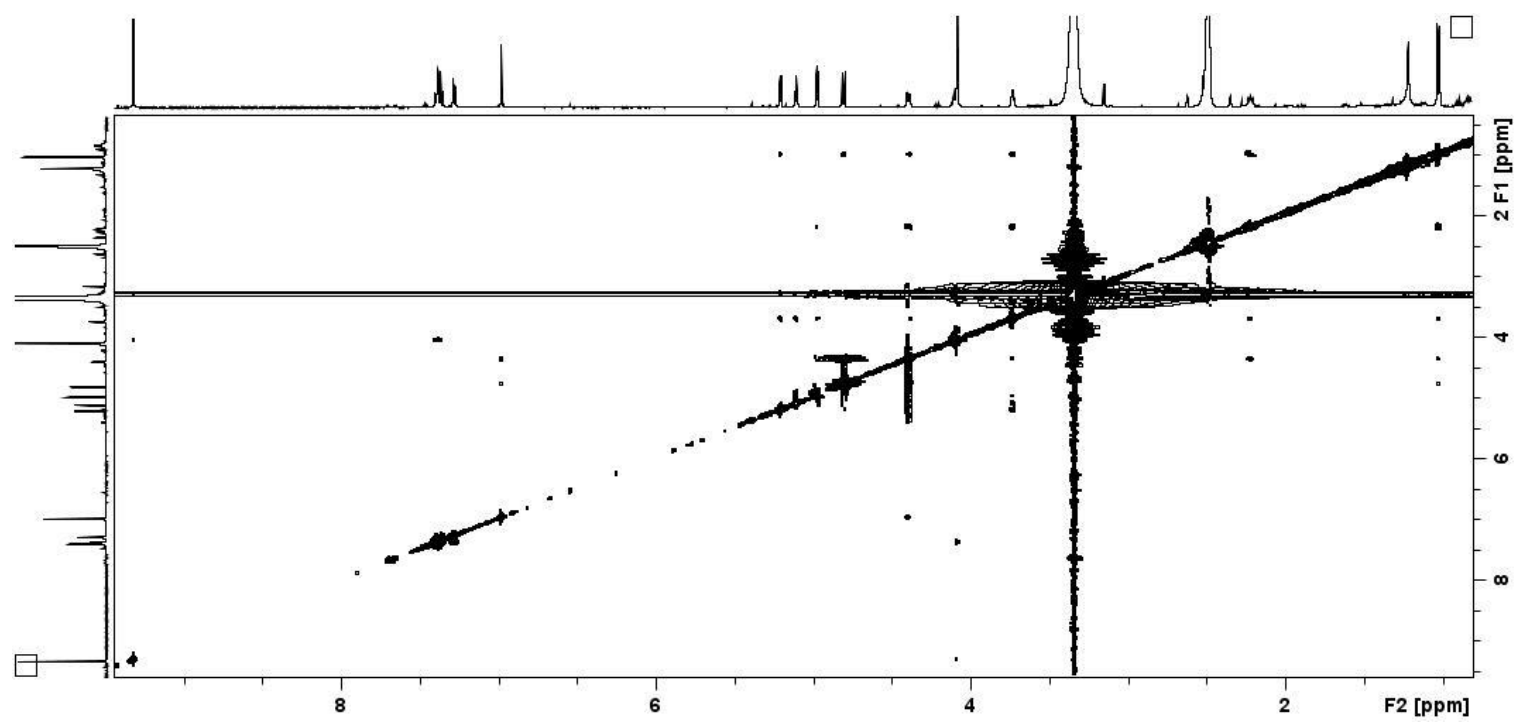



**Figure S20.** The HRESIMS spectrum of compound **2**

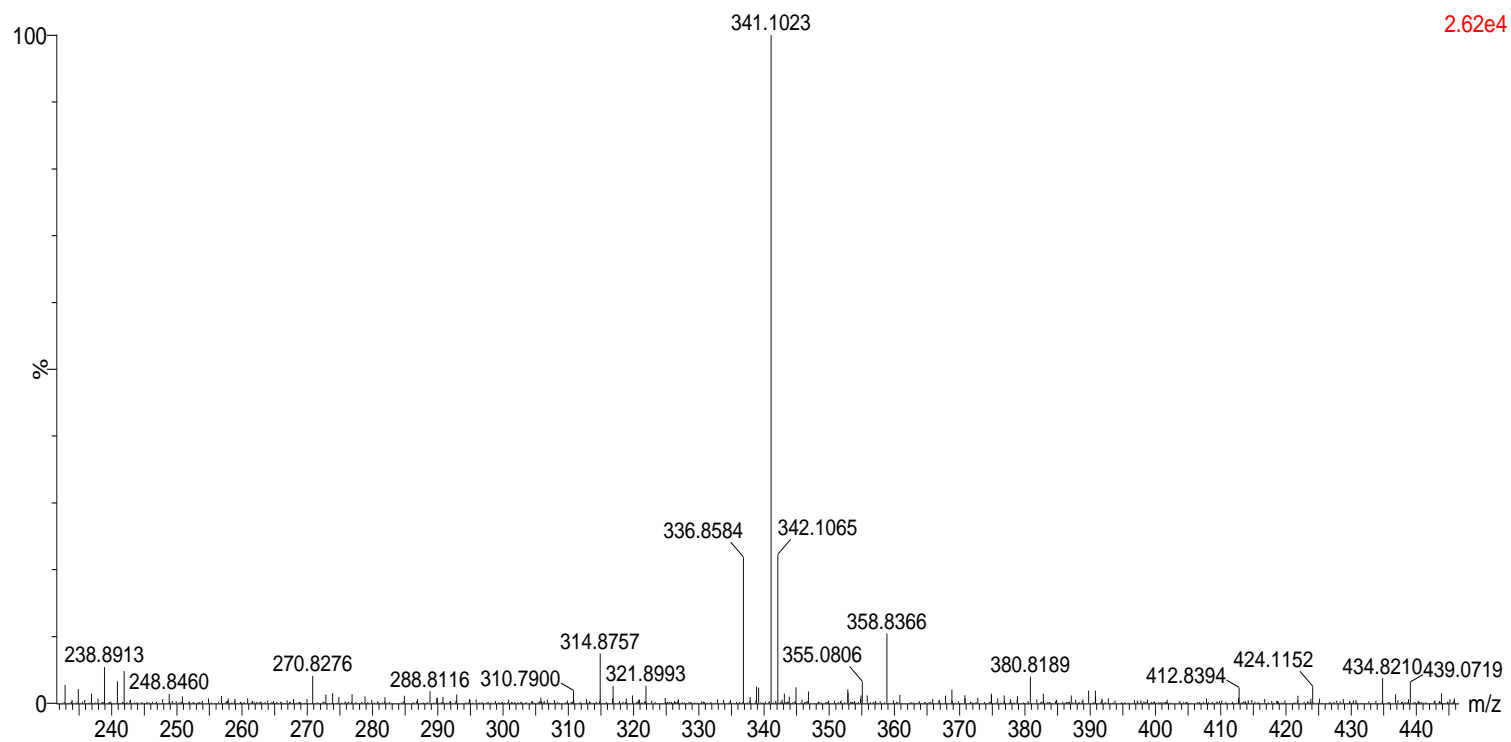

Figure S21. The IR spectrum of compound 2

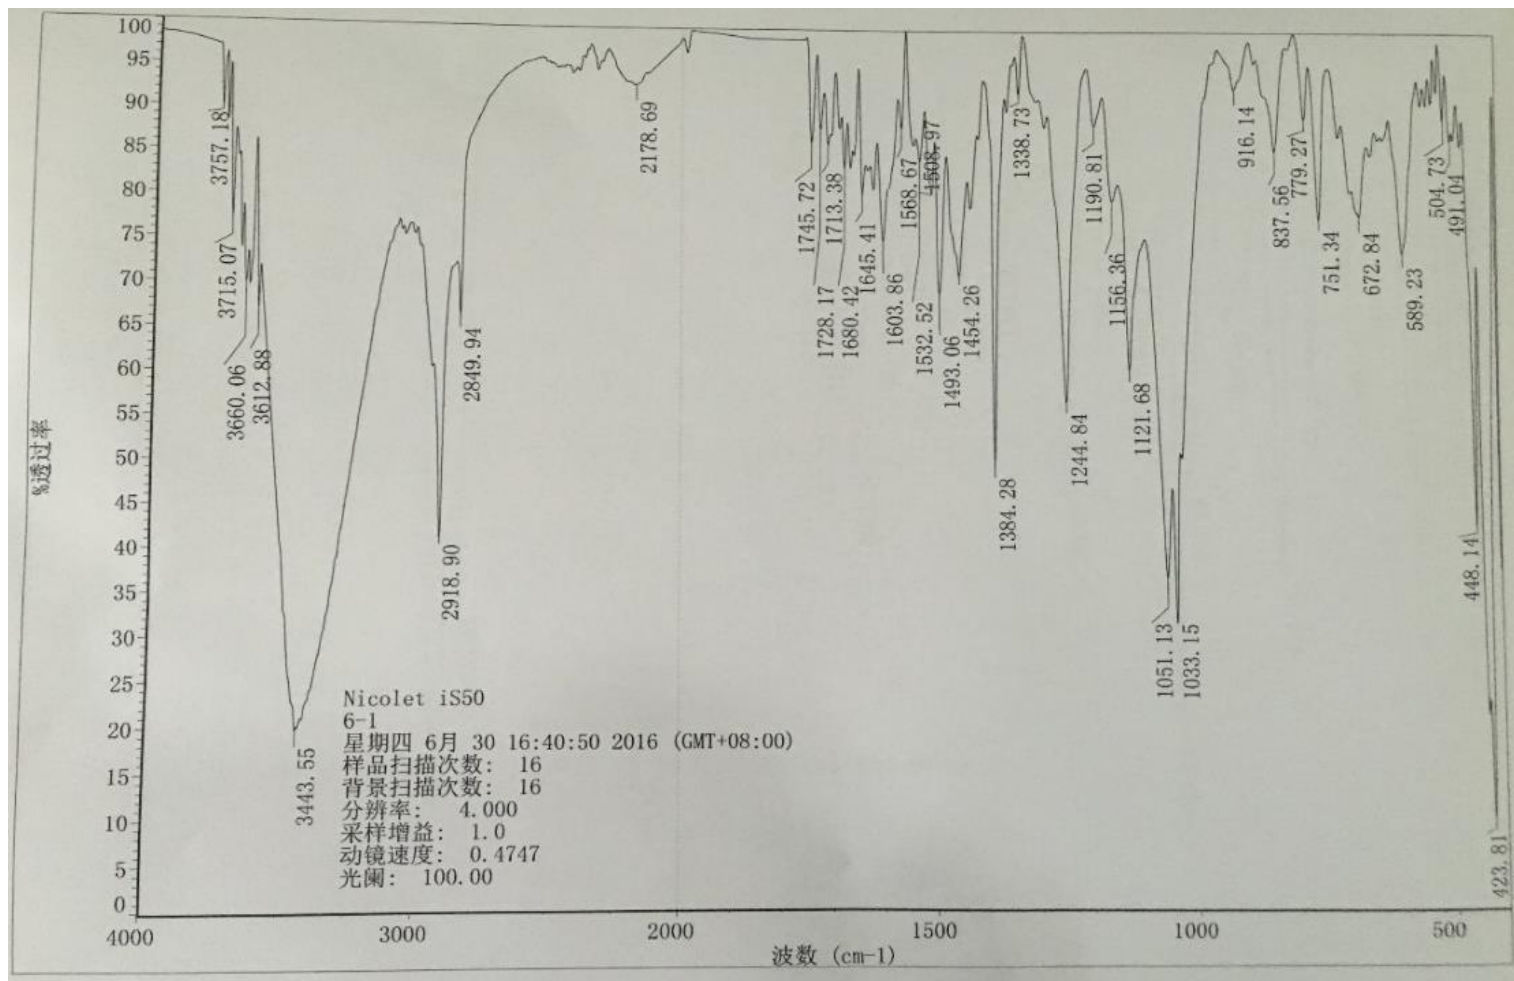

Figure S22. The  $^1\text{H}$  NMR (600 MHz) spectrum of compound **3** in  $\text{DMSO-}d_6$

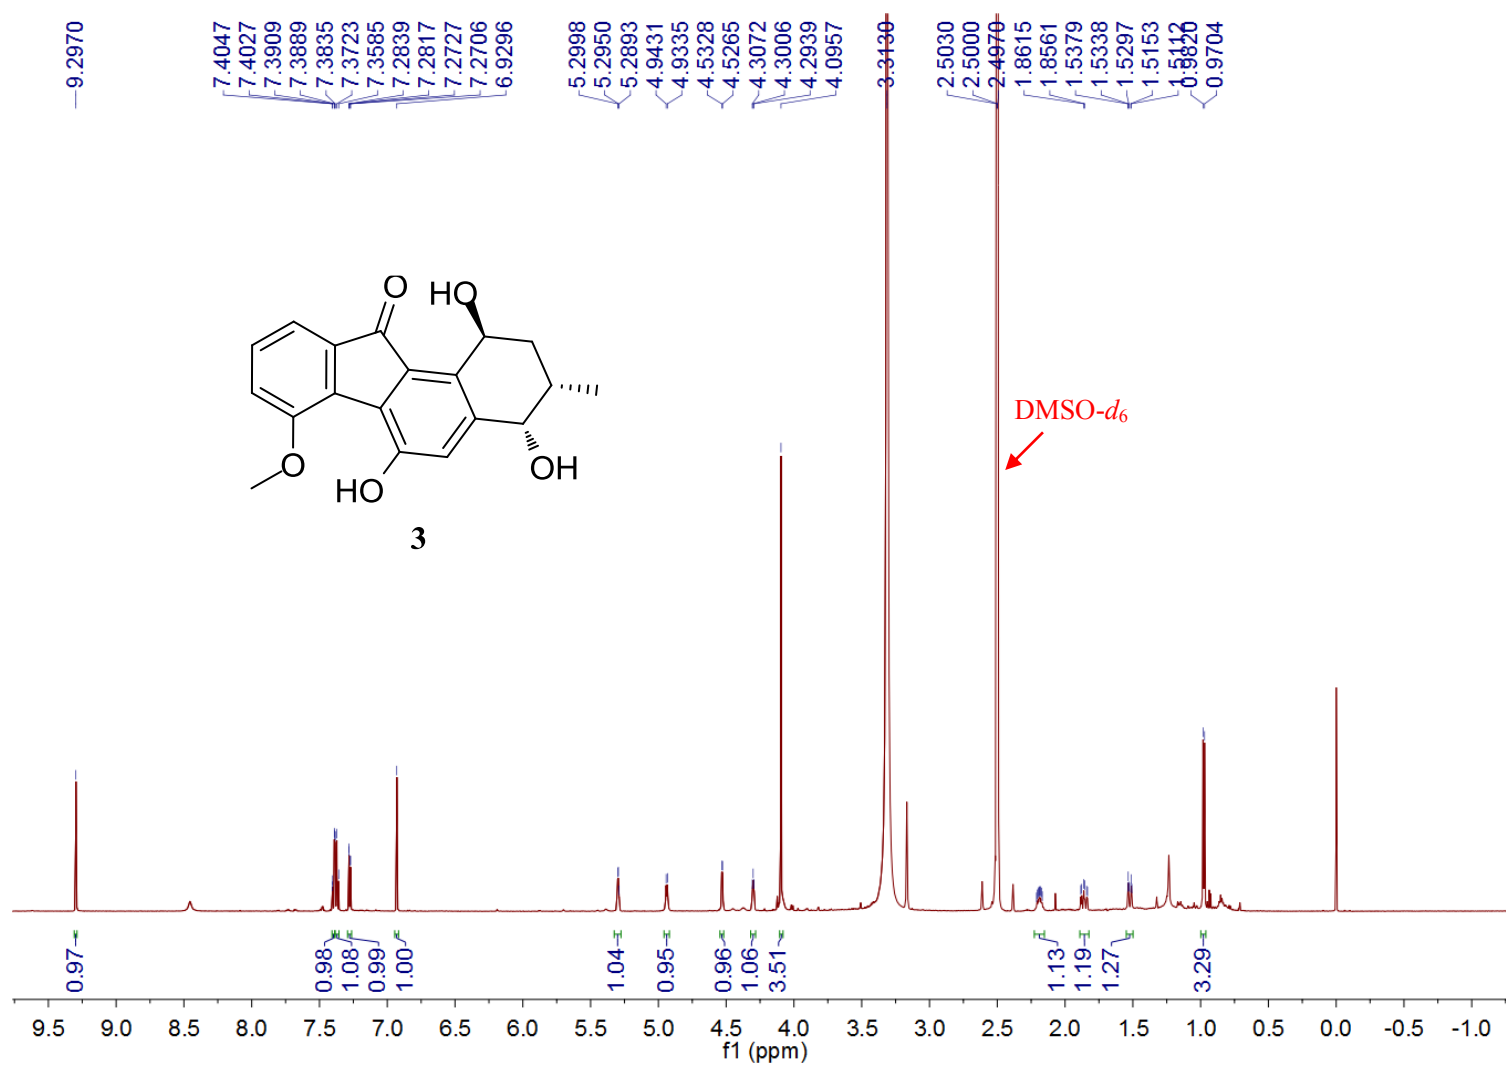

**Figure S23.** The  $^{13}\text{C}$  NMR (150 MHz) spectrum of compound **3** in  $\text{DMSO-}d_6$

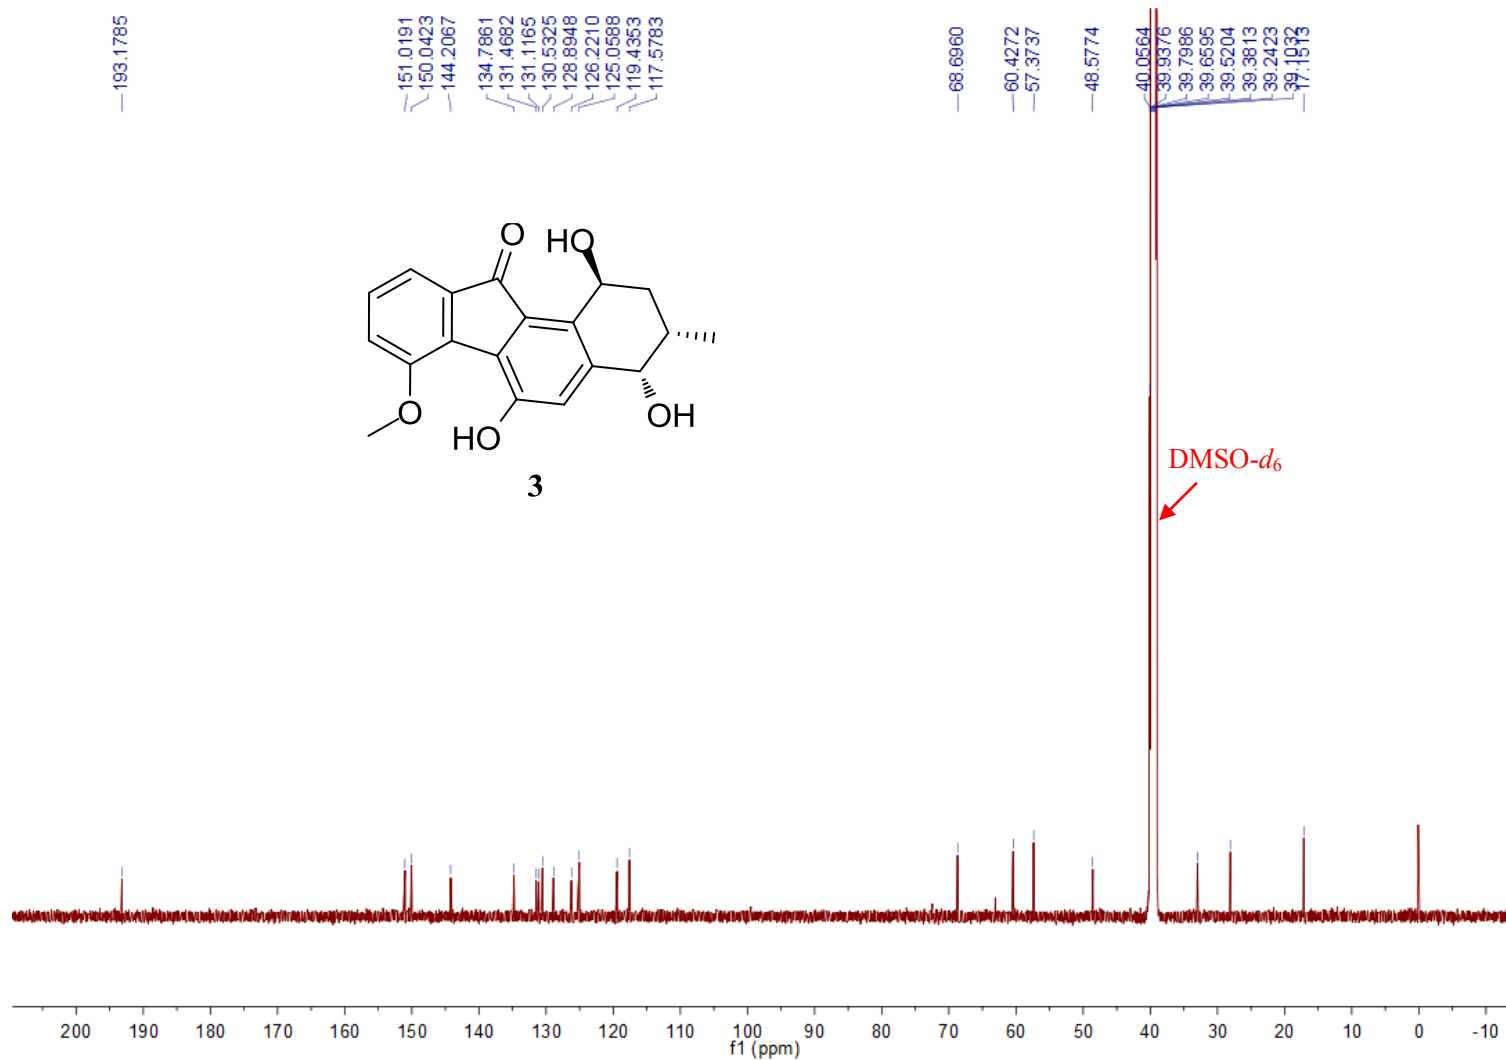

**Figure S24.** The COSY spectrum of compound **3** in DMSO-*d*<sub>6</sub>

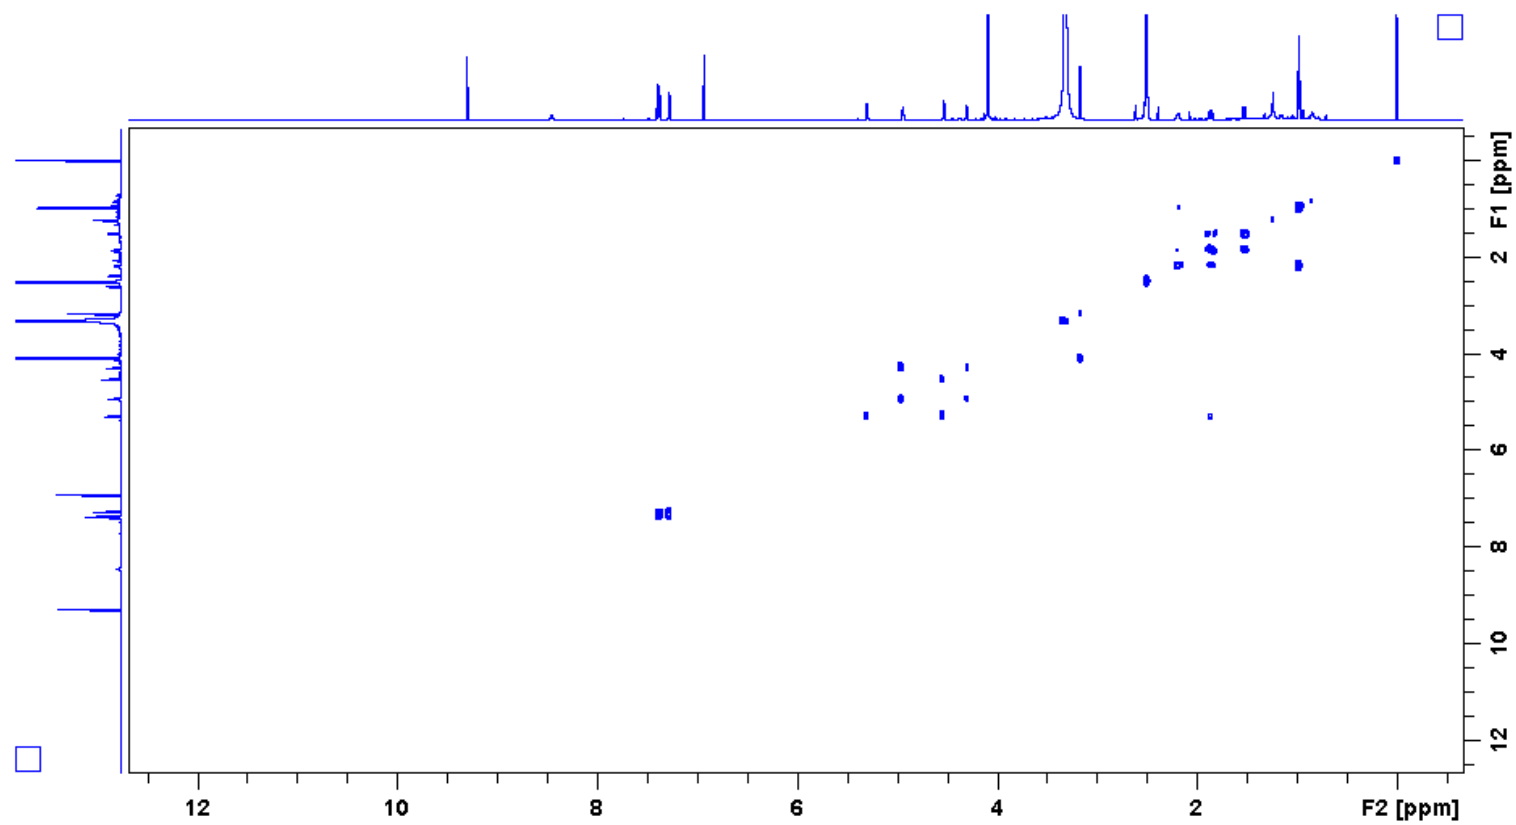

**Figure S25.** The HSQC spectrum of compound **3** in DMSO-*d*<sub>6</sub>

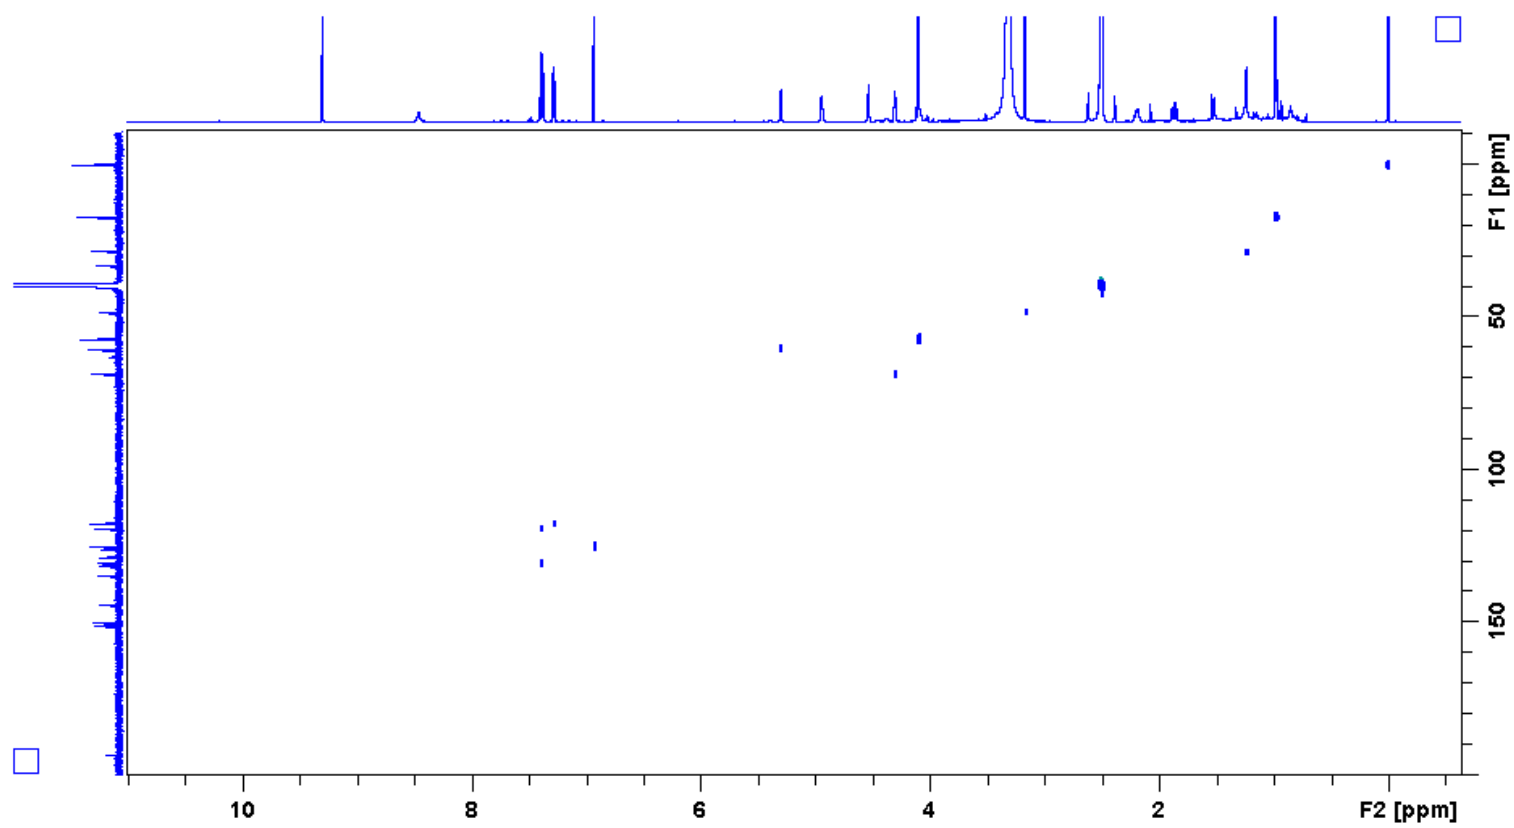

Figure S26. The HMBC spectrum of compound **3** in DMSO-*d*<sub>6</sub>

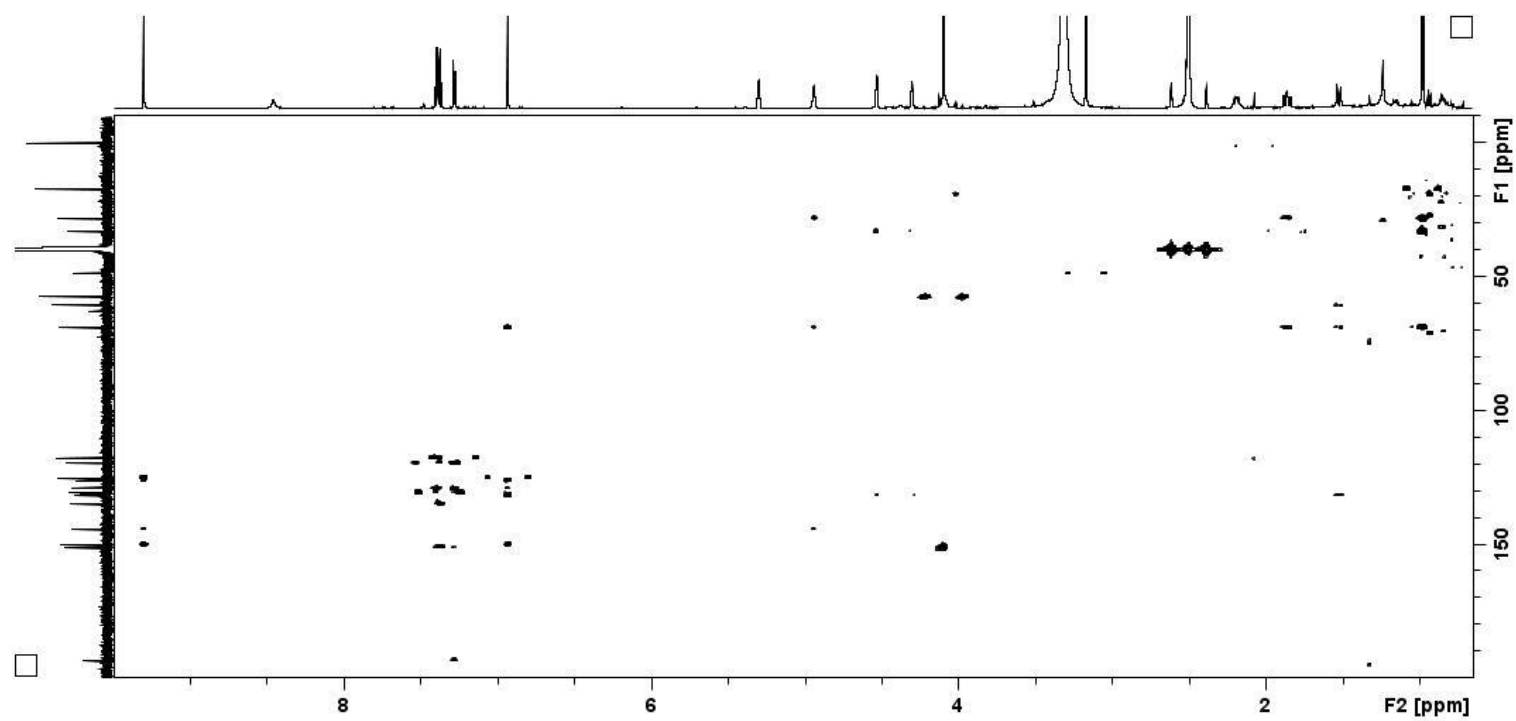

Figure S27. The ROESY spectrum of compound 3 in DMSO- $d_6$

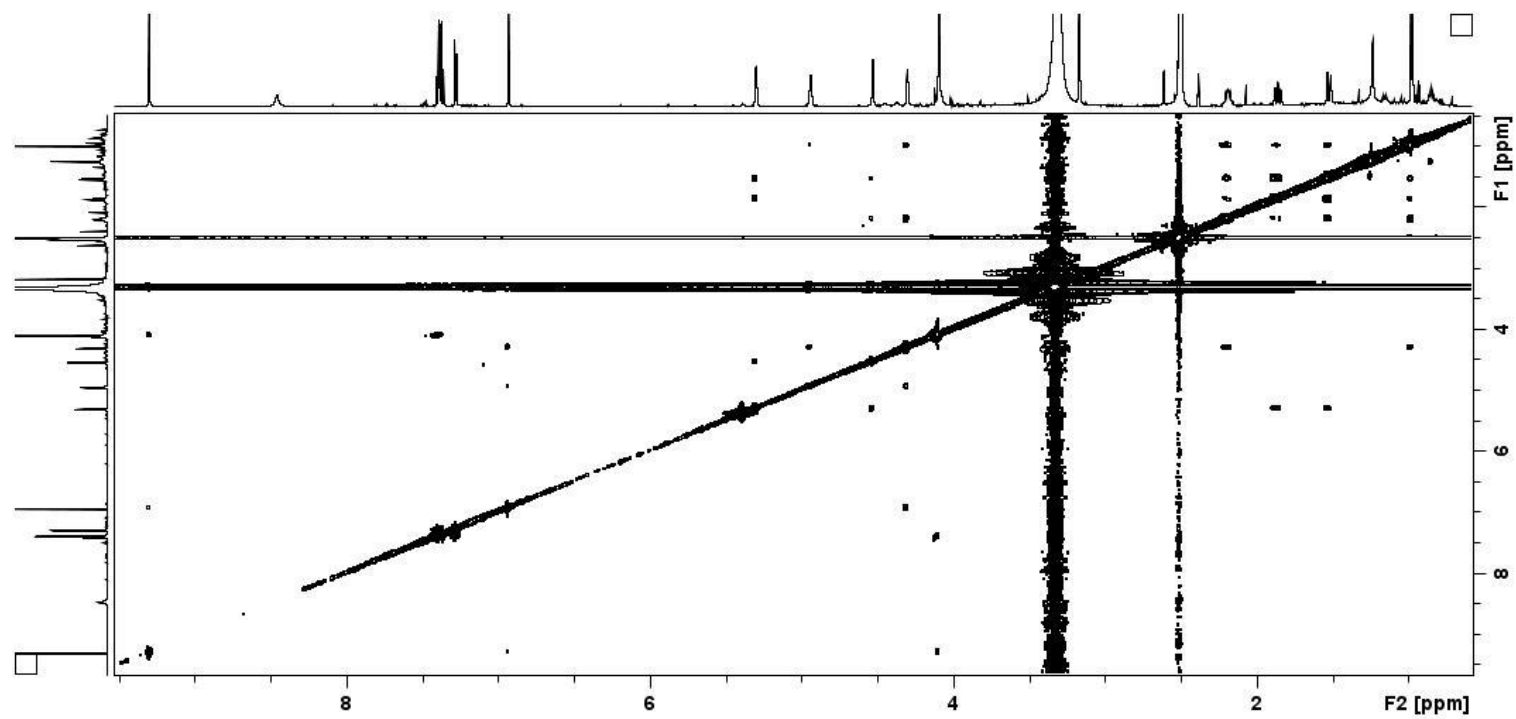



**Figure S28.** The HRESIMS spectrum of compound **3**

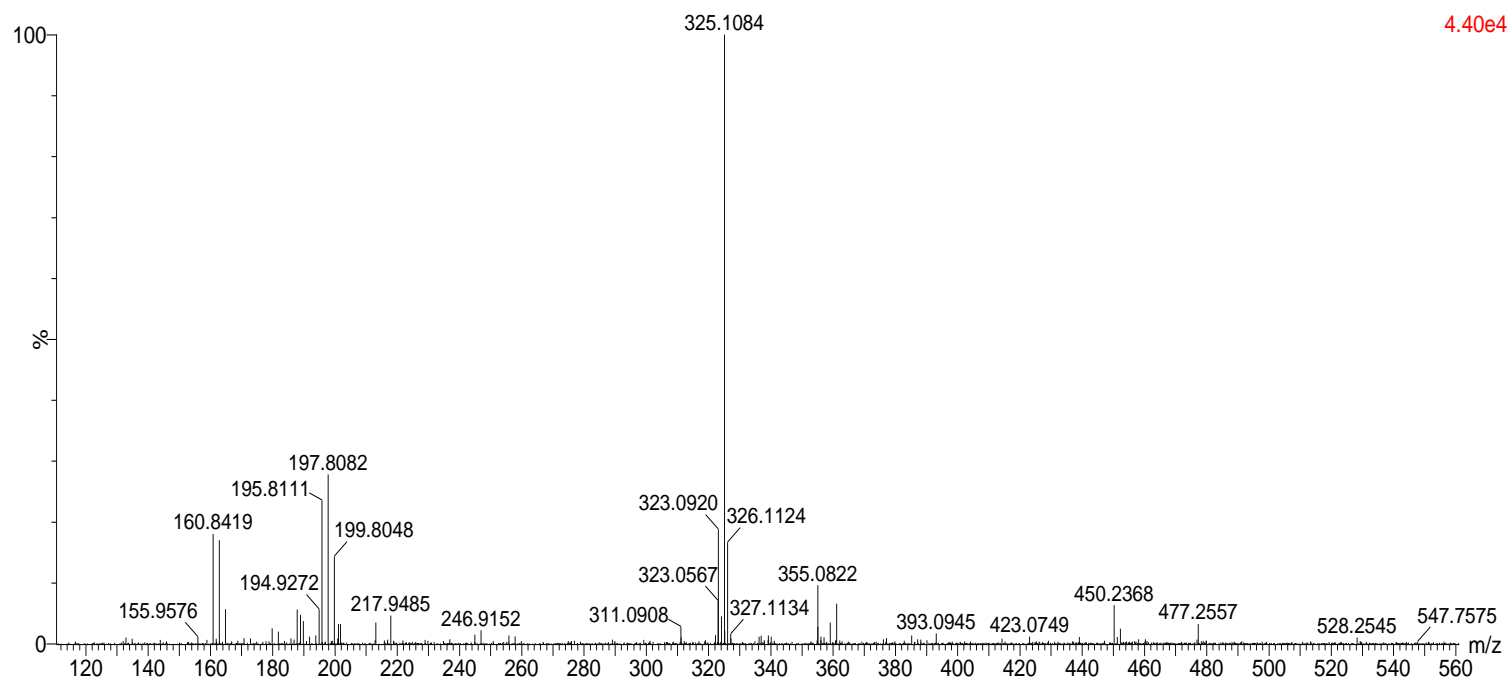

Figure S29. The IR spectrum of compound 3

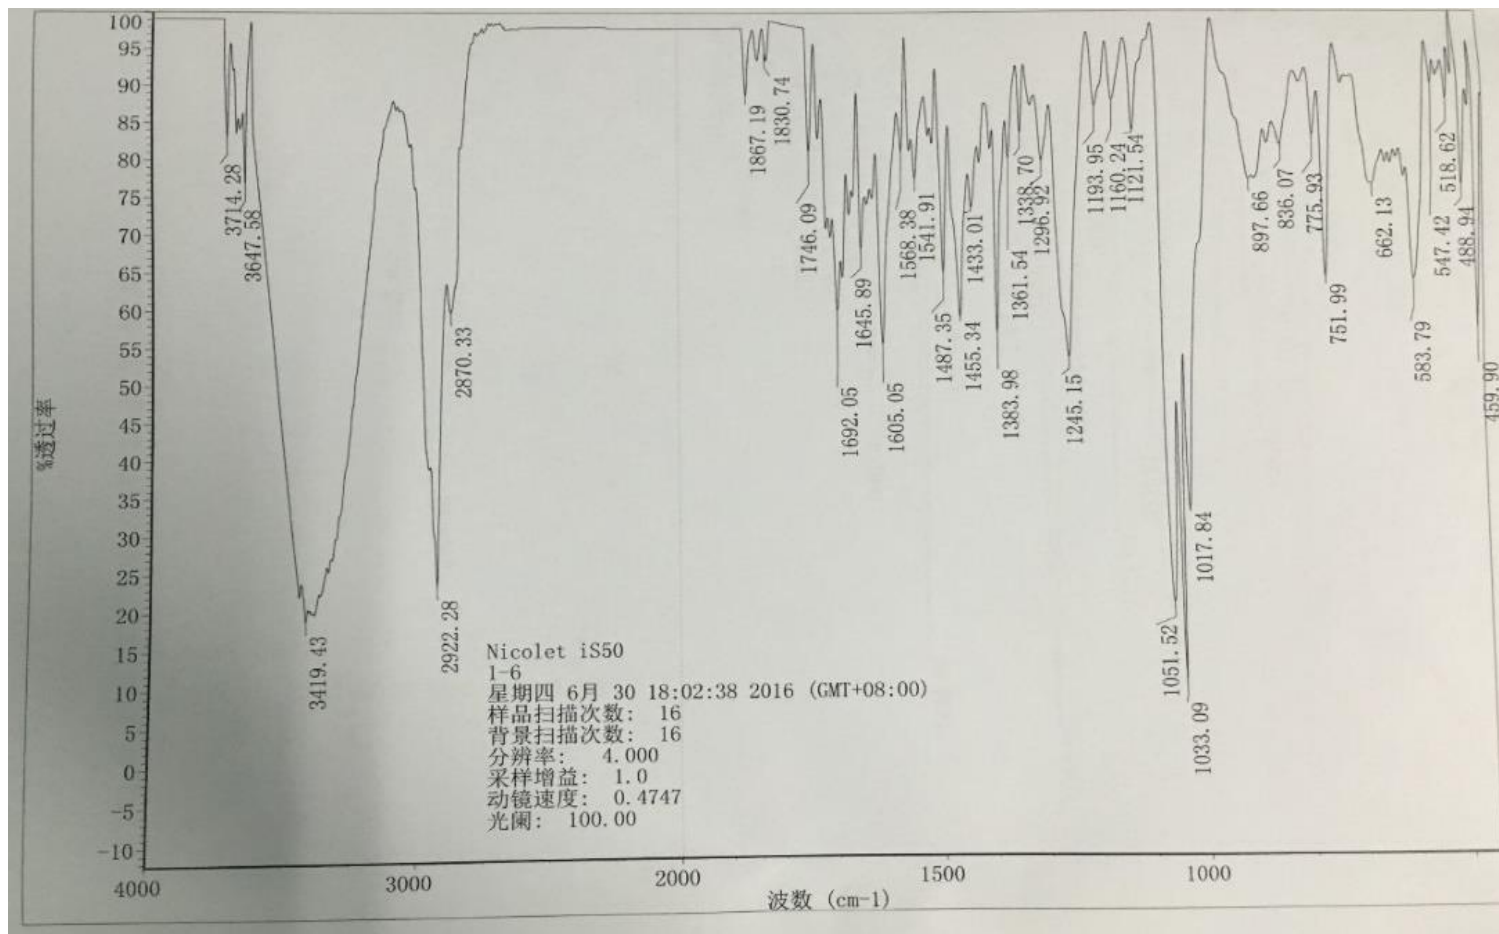

Figure S30. The  $^1\text{H}$  NMR (600 MHz) spectrum of compound **4** in  $\text{DMSO-}d_6$

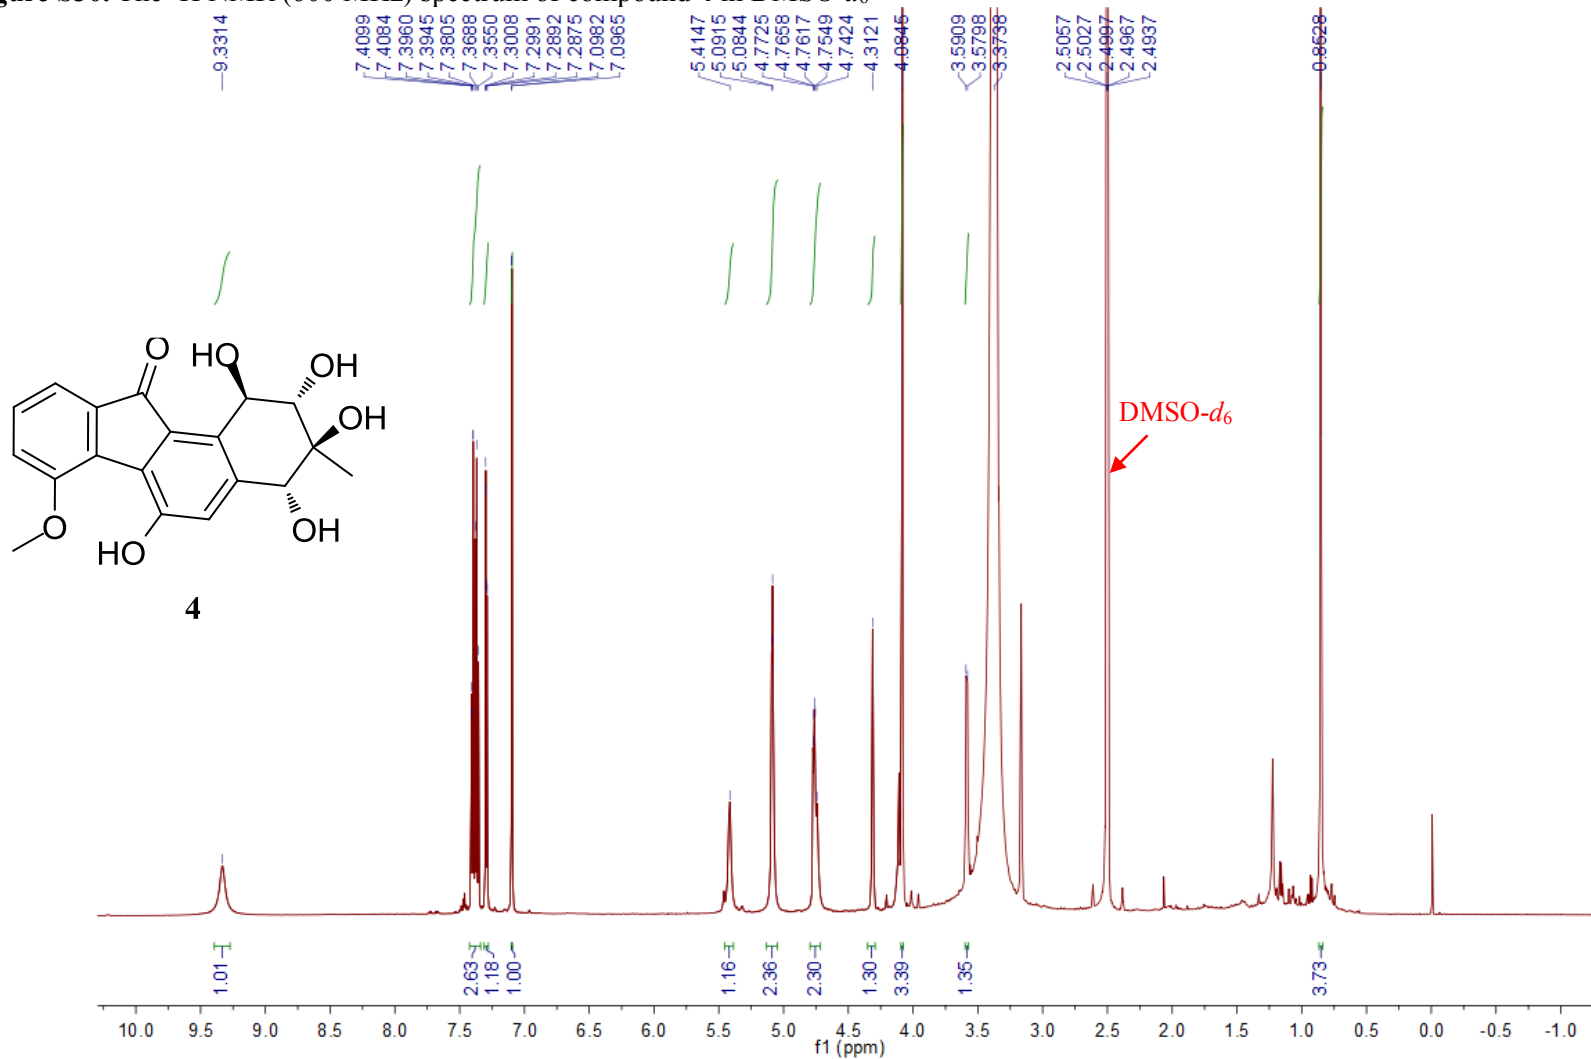

Figure S31. The APT (150 MHz) spectrum of compound **4** in DMSO-*d*<sub>6</sub>

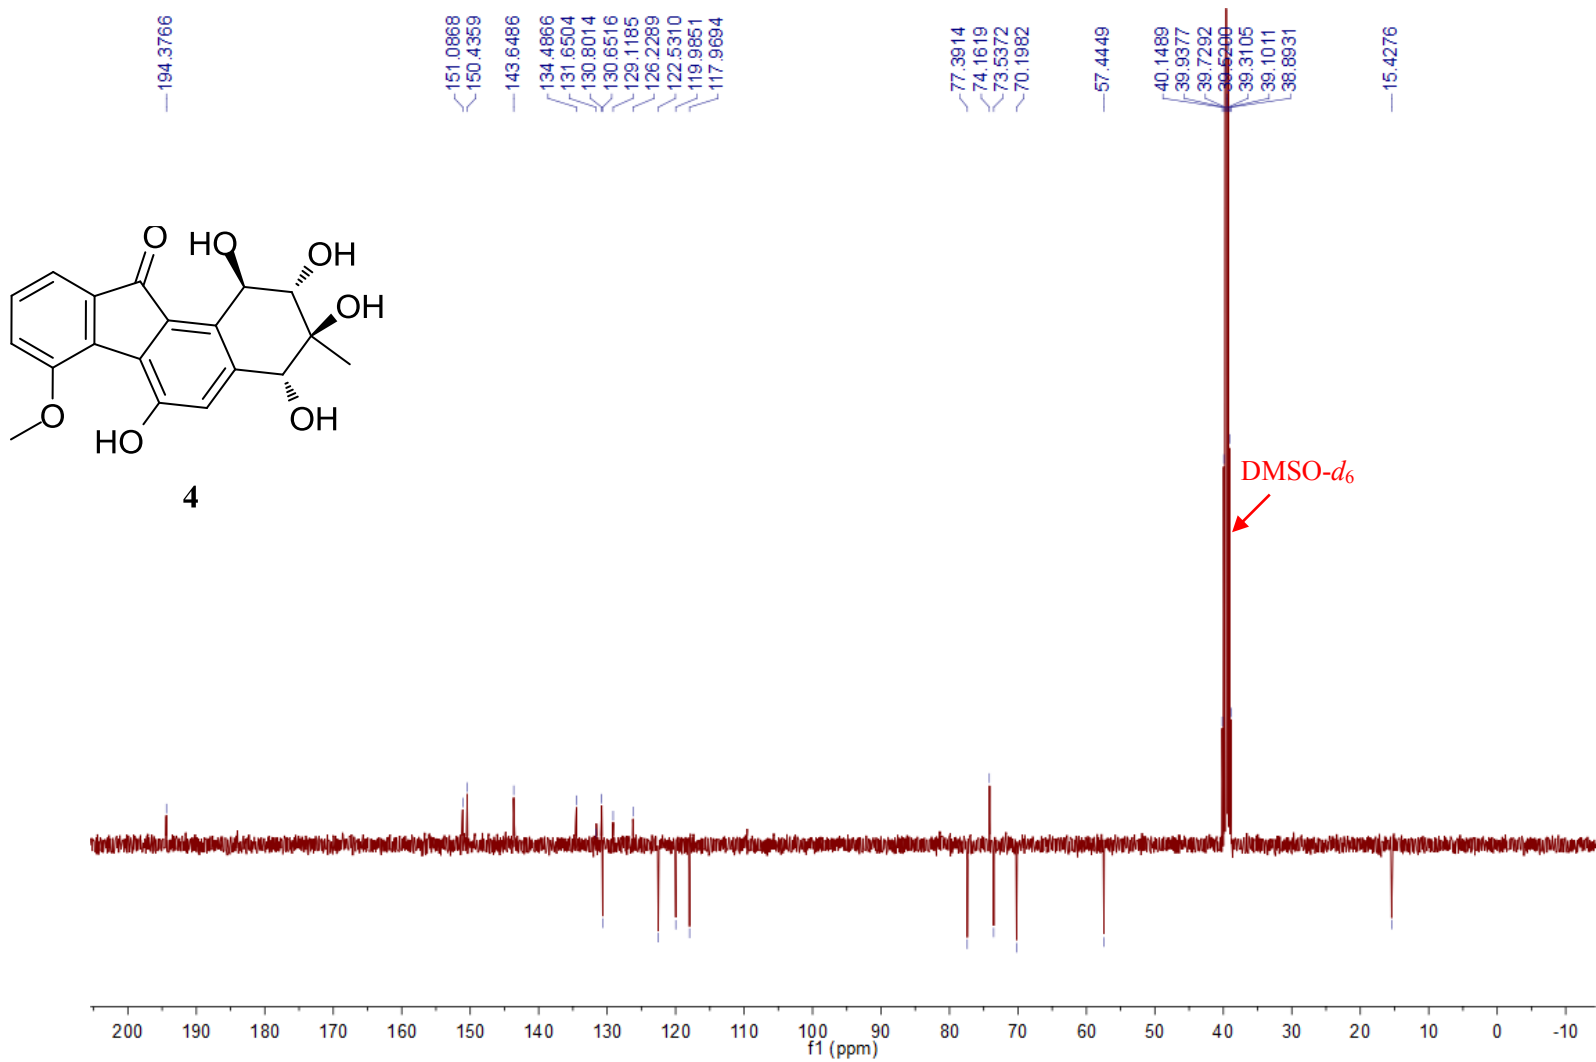

**Figure S32.** The COSY spectrum of compound **4** in DMSO-*d*<sub>6</sub>

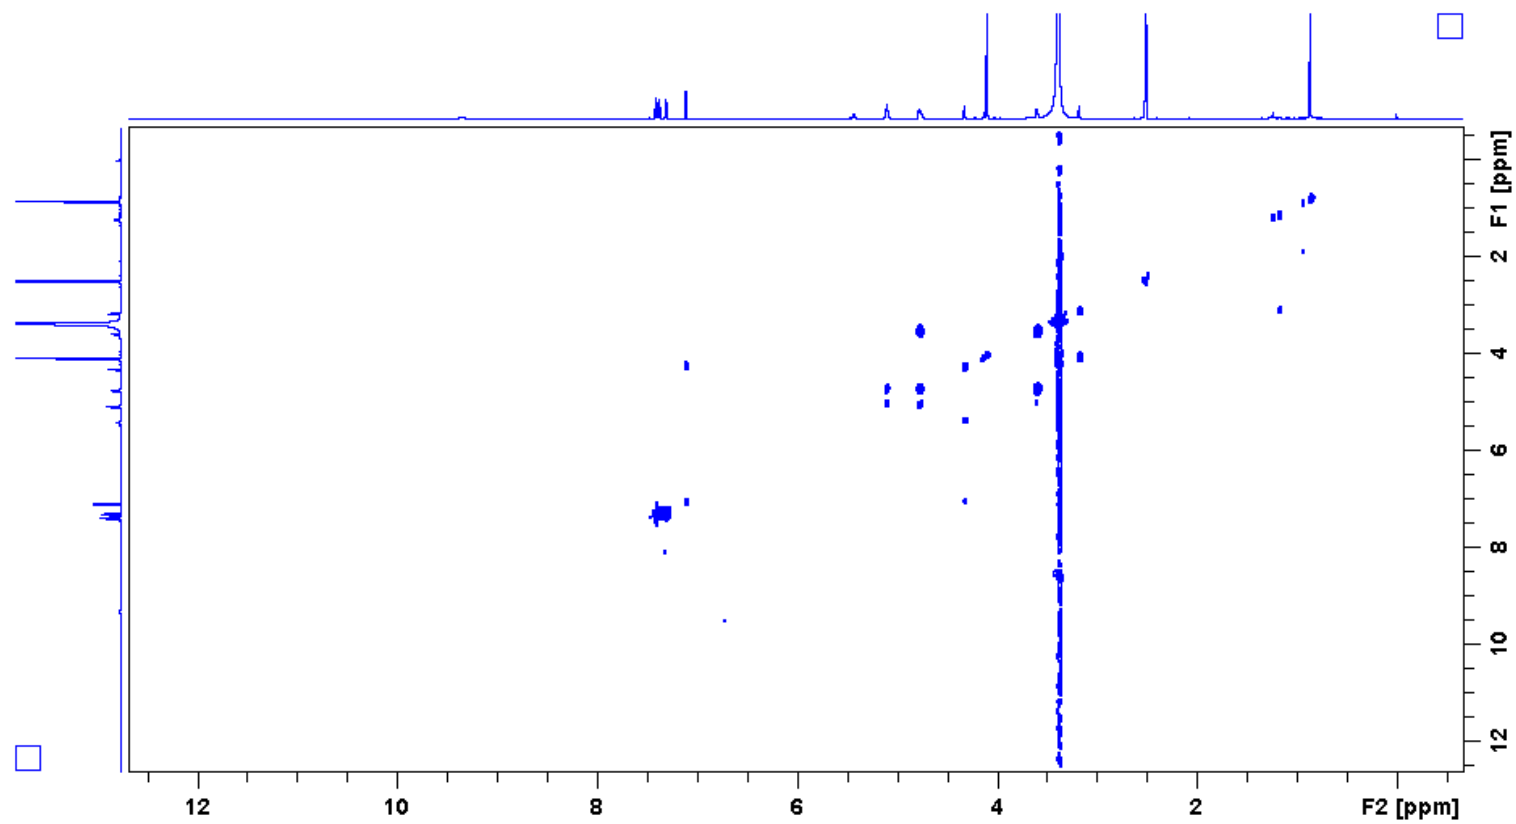

Figure S33. The HSQC spectrum of compound 4 in DMSO-*d*<sub>6</sub>

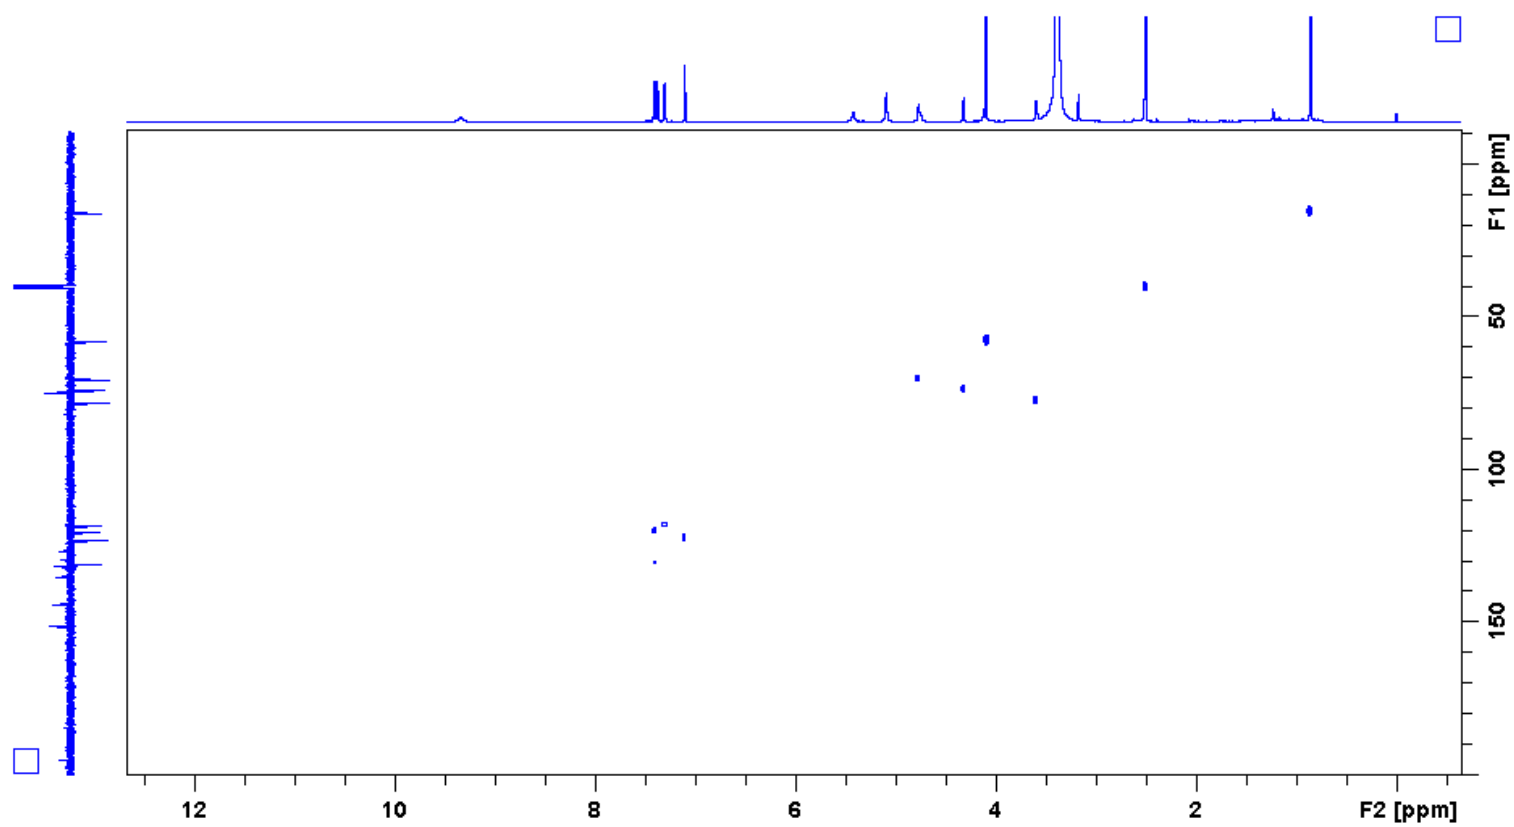

Figure S34. The HMBC spectrum of compound 4 in DMSO-*d*<sub>6</sub>

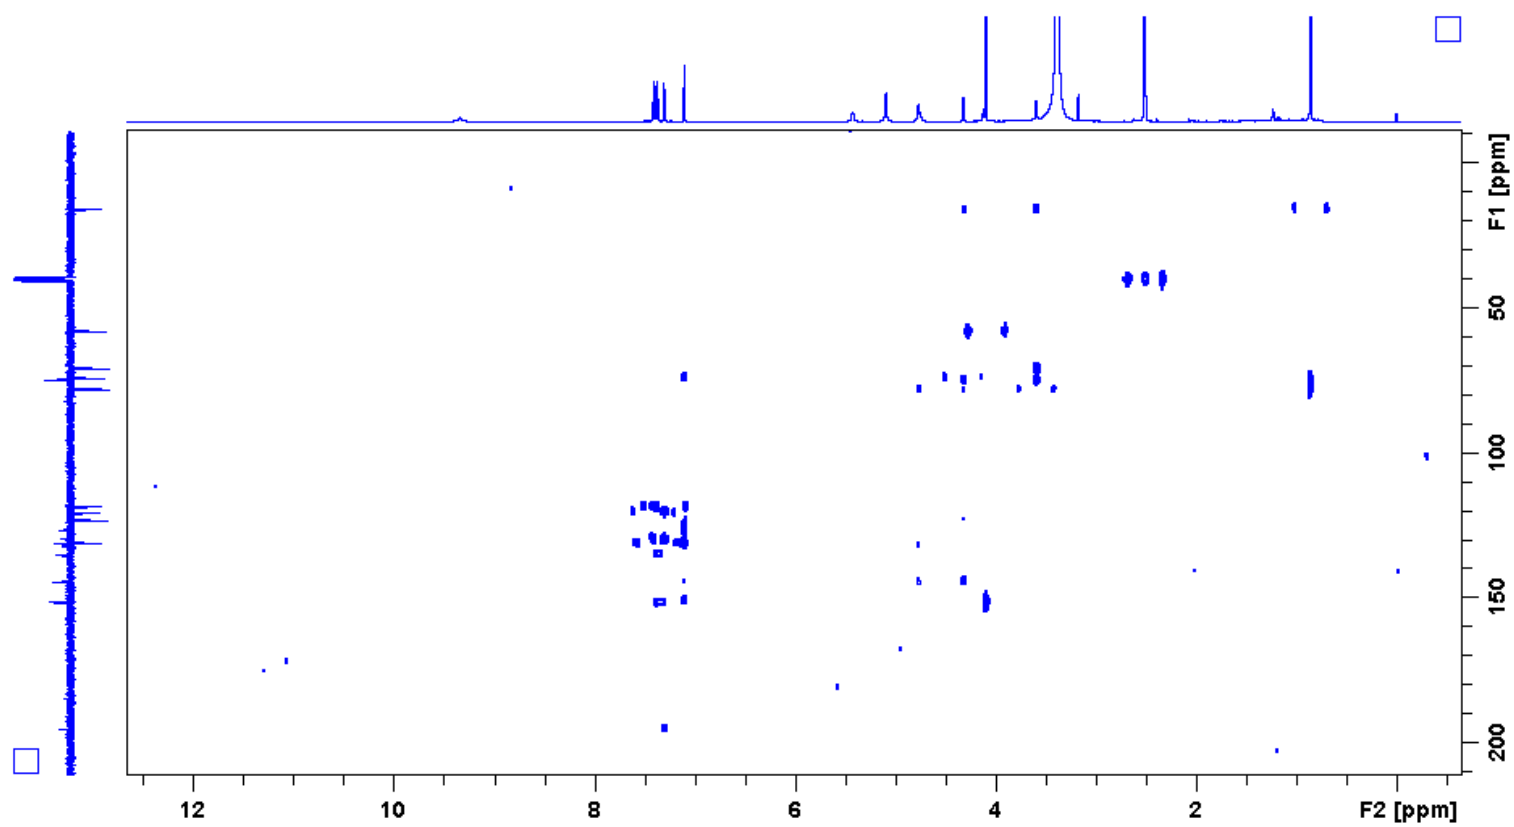

Figure S35. The ROESY spectrum of compound 4 in DMSO-*d*<sub>6</sub>

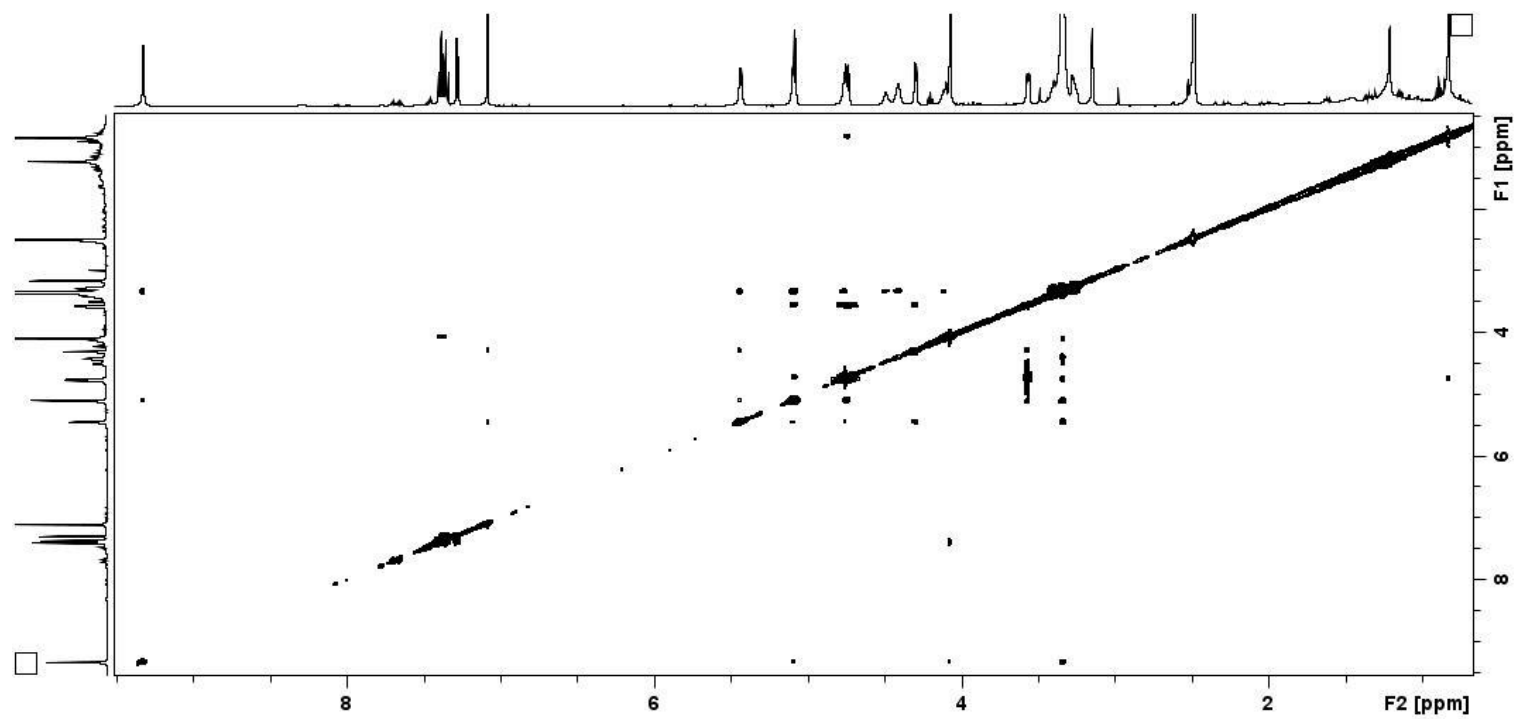



**Figure S36.** The HRESIMS spectrum of compound **4**

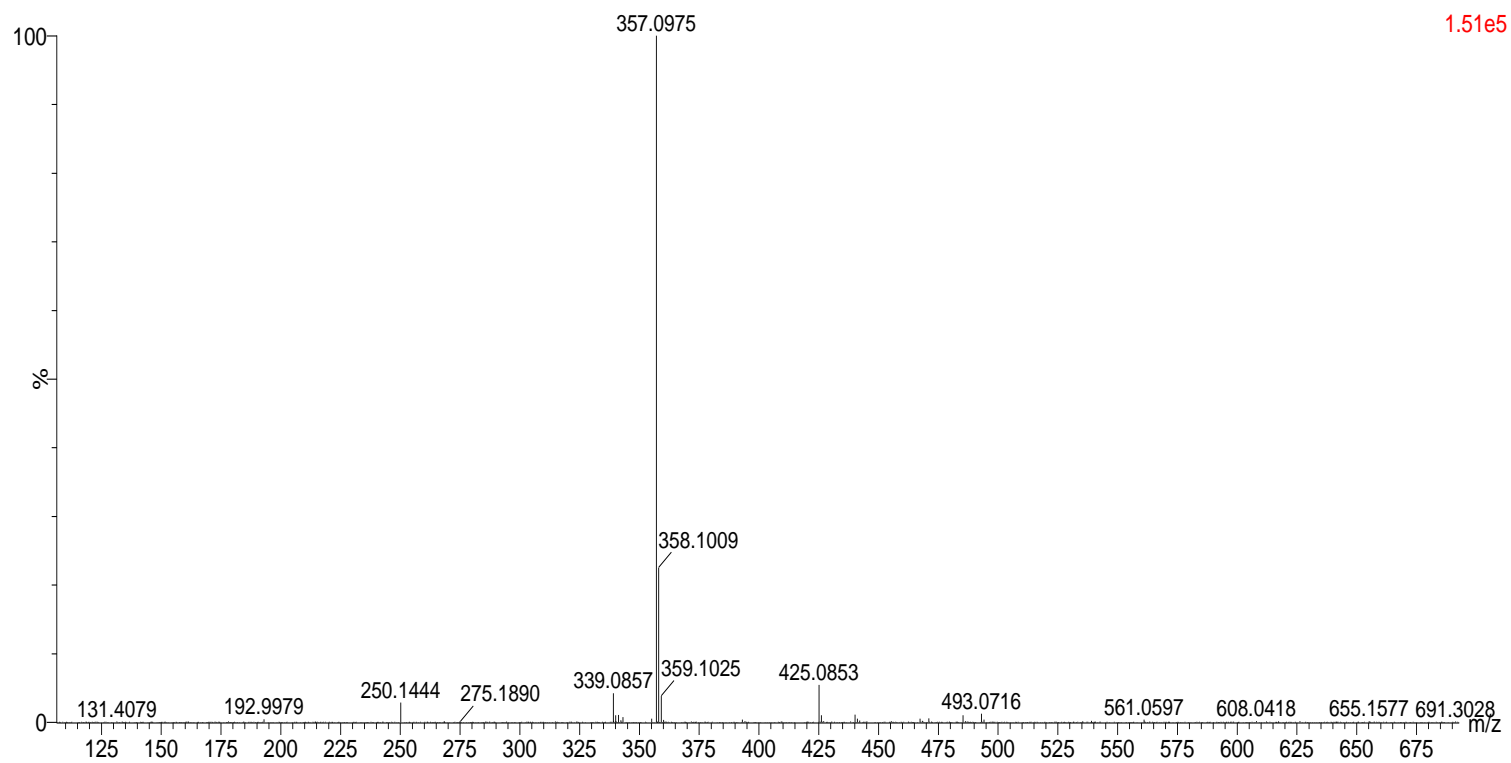

Figure S37. The IR spectrum of compound 4

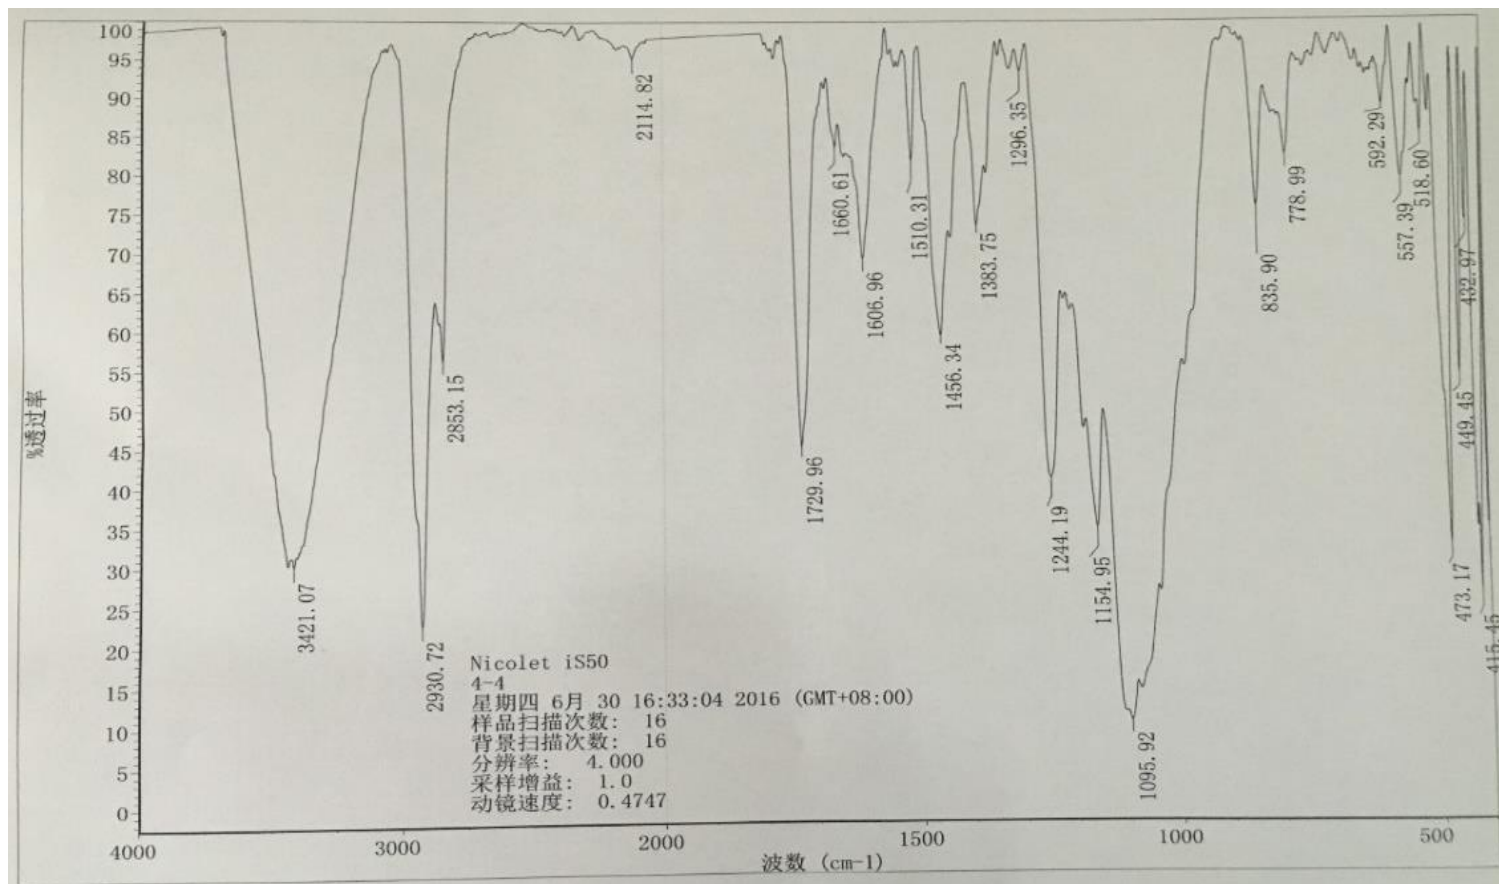

Figure S38. The  $^1\text{H}$  NMR (600 MHz) spectrum of compound **5** in  $\text{DMSO-}d_6$

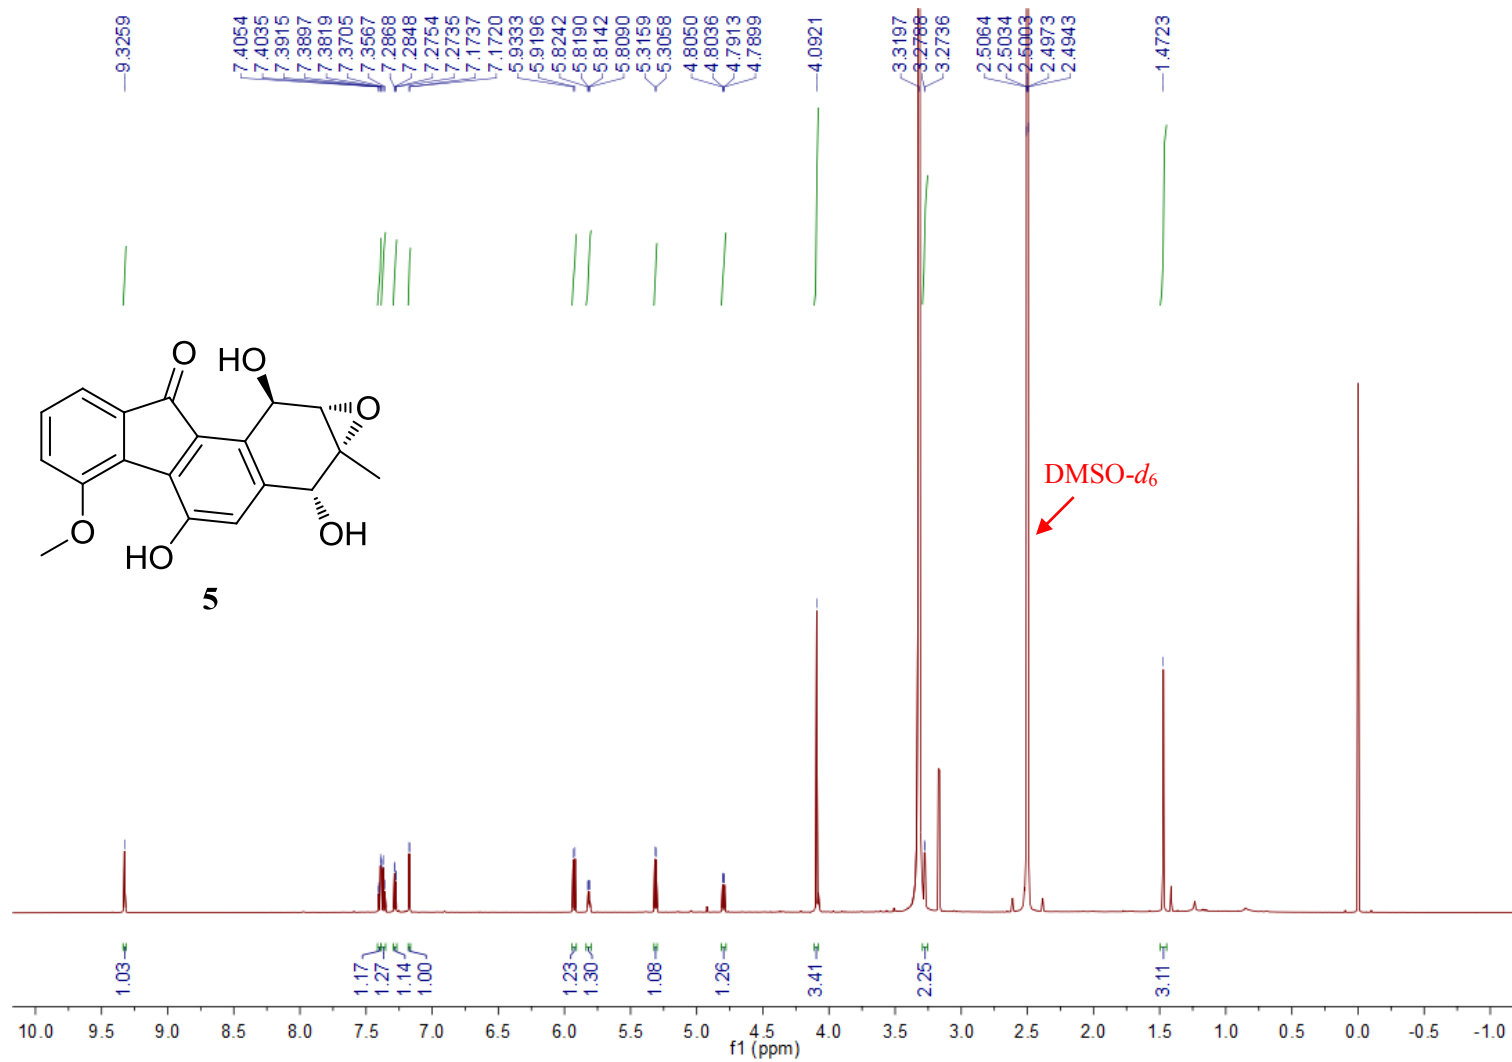

Figure S39. The  $^{13}\text{C}$  NMR (150 MHz) spectrum of compound **5** in  $\text{DMSO-}d_6$

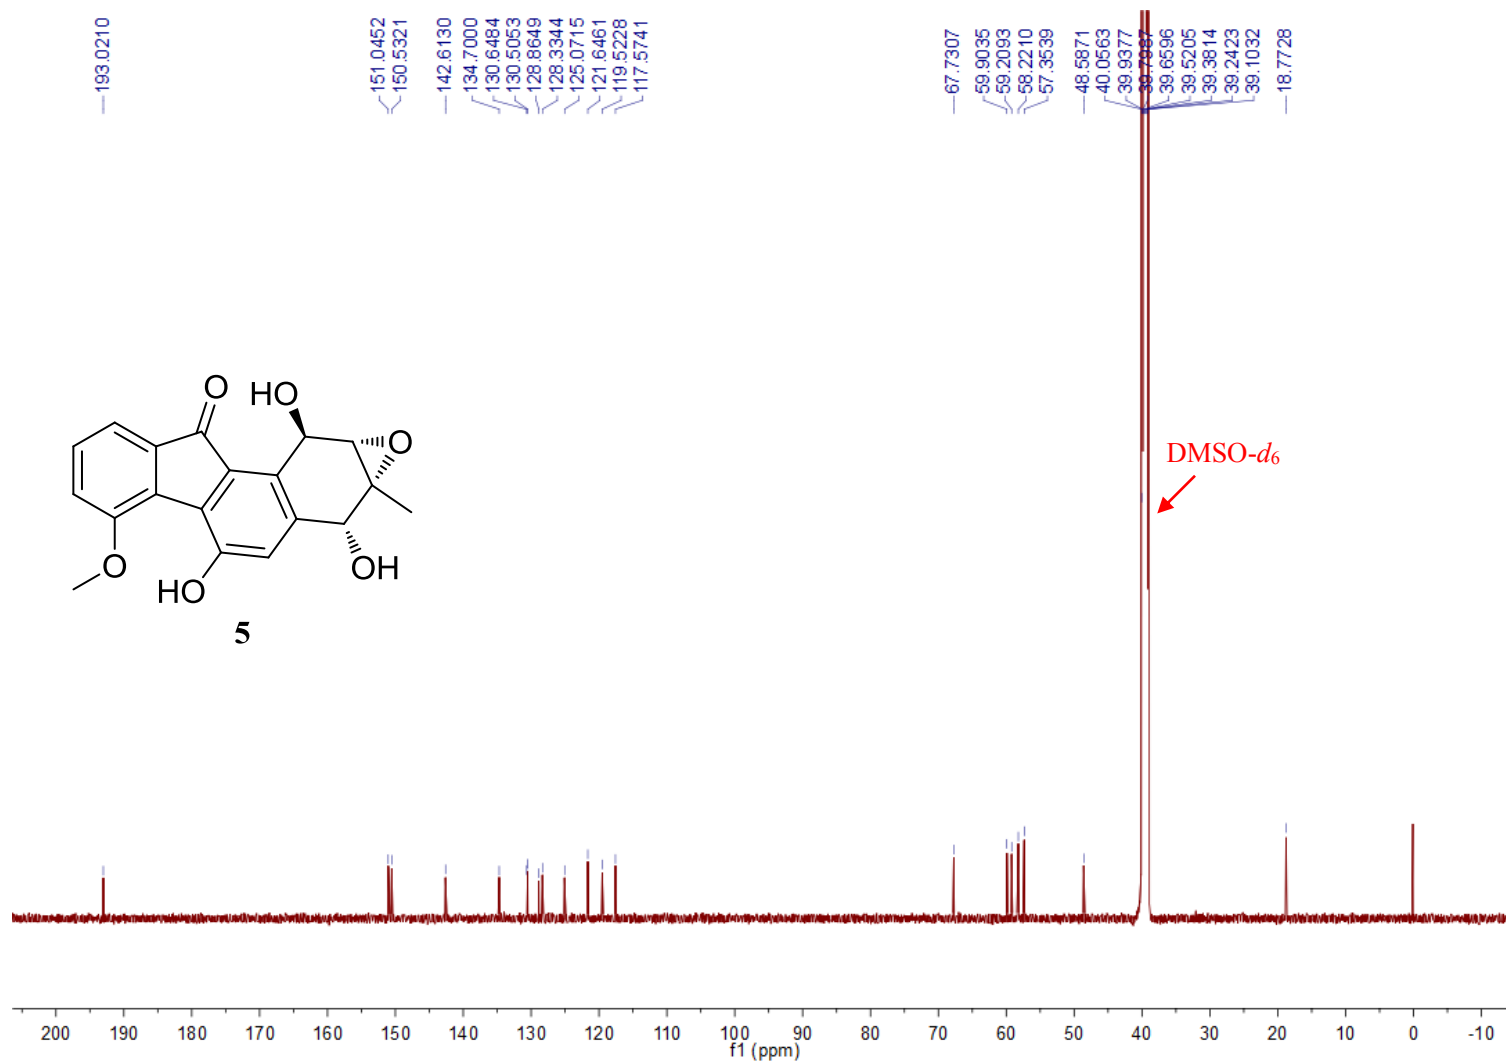

**Figure S40.** The COSY spectrum of compound **5** in DMSO-*d*<sub>6</sub>

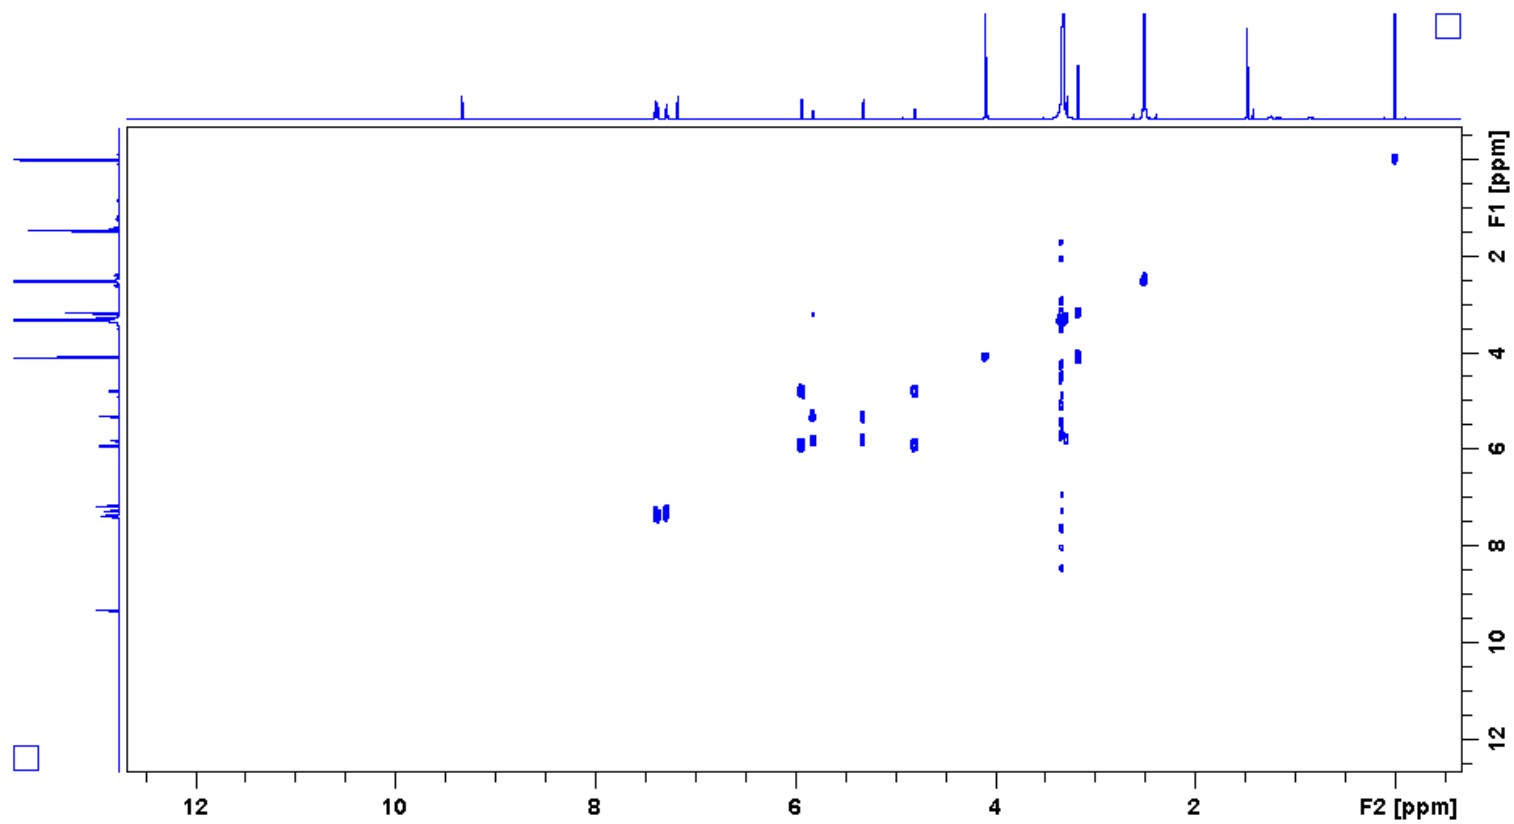

Figure S41. The HSQC spectrum of compound **5** in DMSO-*d*<sub>6</sub>

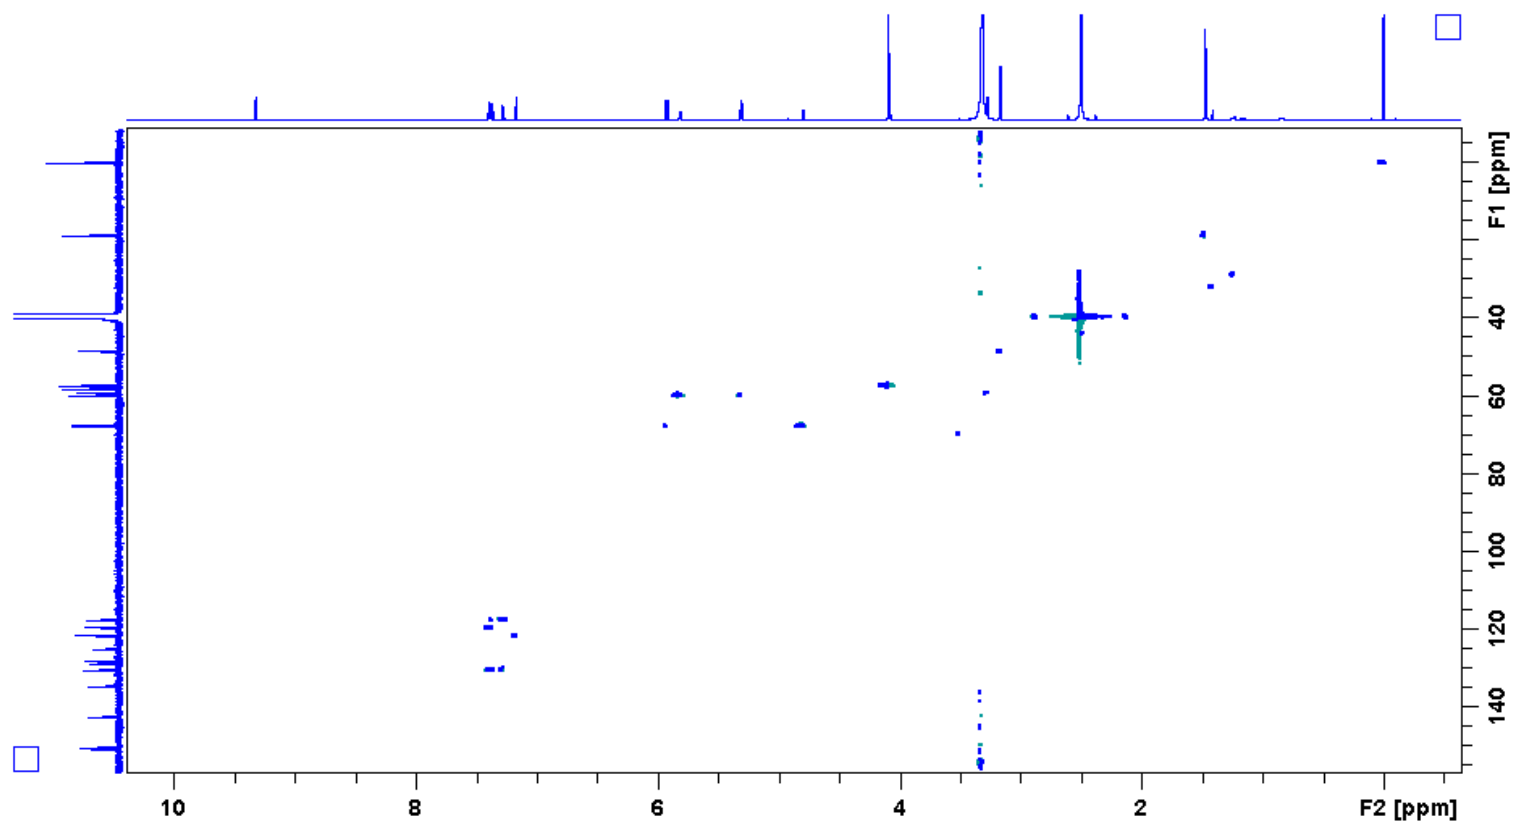

Figure S42. The HMBC spectrum of compound 5 in DMSO-*d*<sub>6</sub>

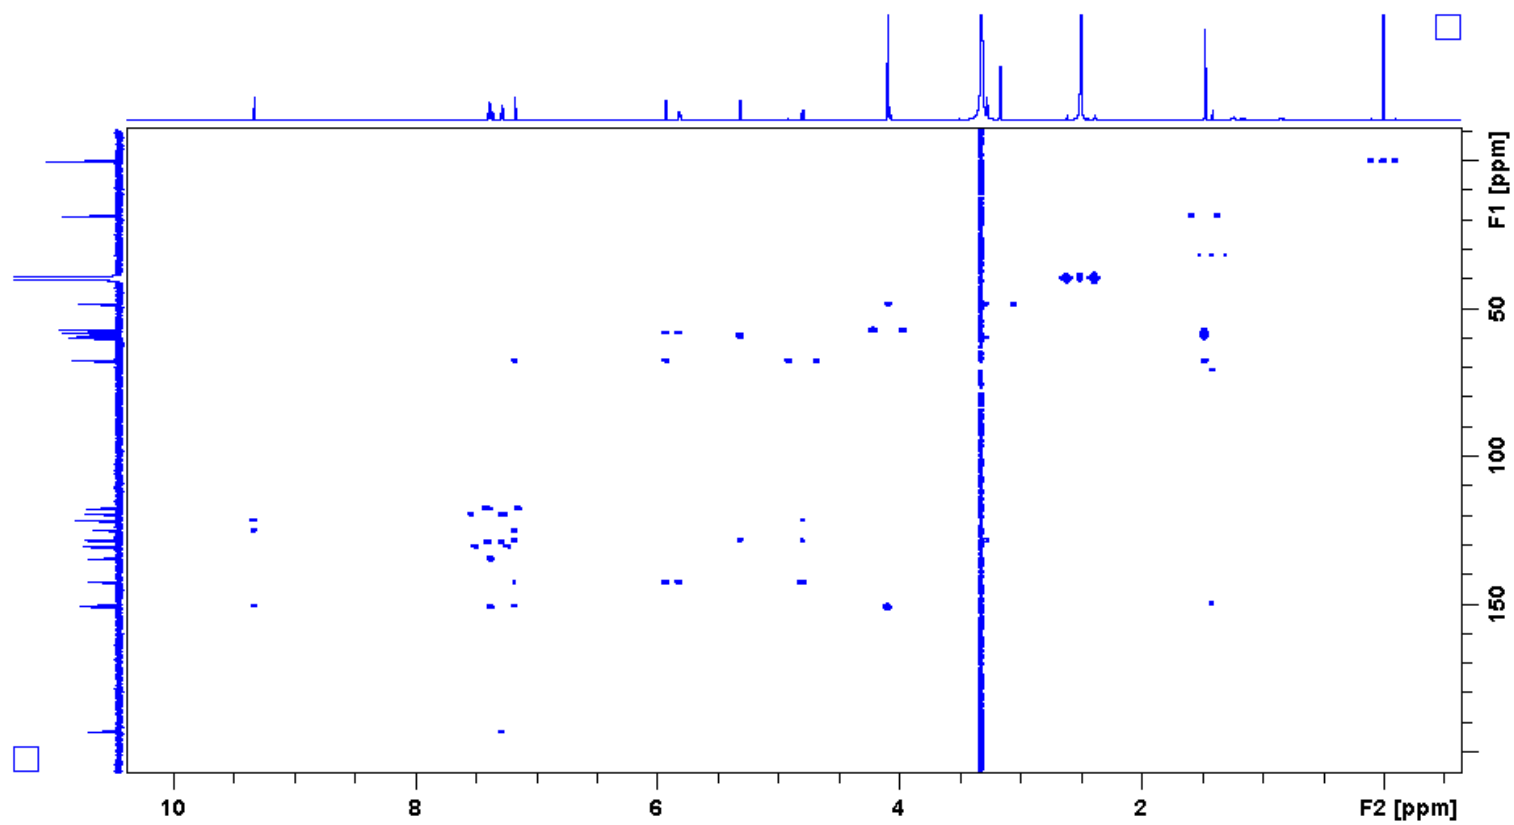

Figure S43. The ROESY spectrum of compound 5 in DMSO-*d*<sub>6</sub>

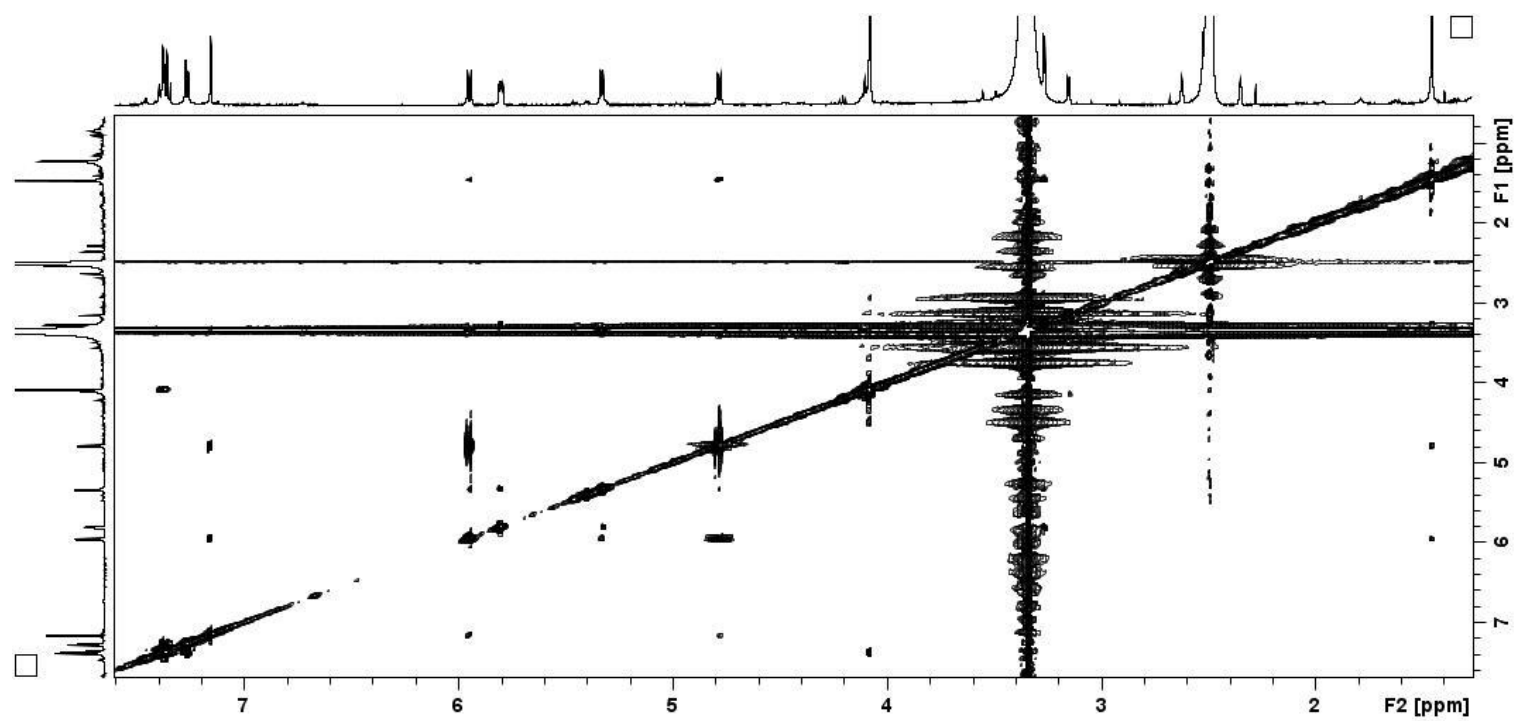



**Figure S44.** The HRESIMS spectrum of compound **5**

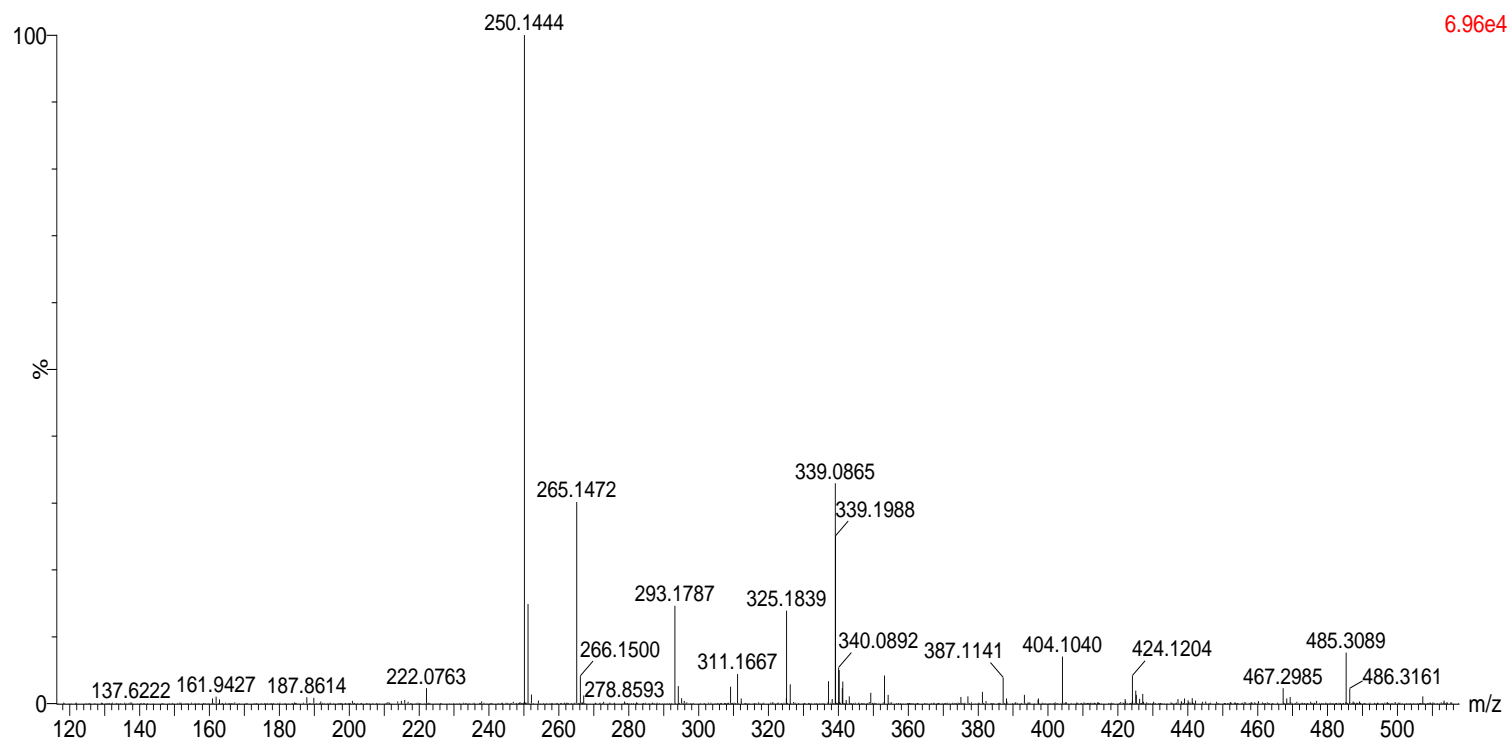

6.96e4

Figure S45. The IR spectrum of compound 5

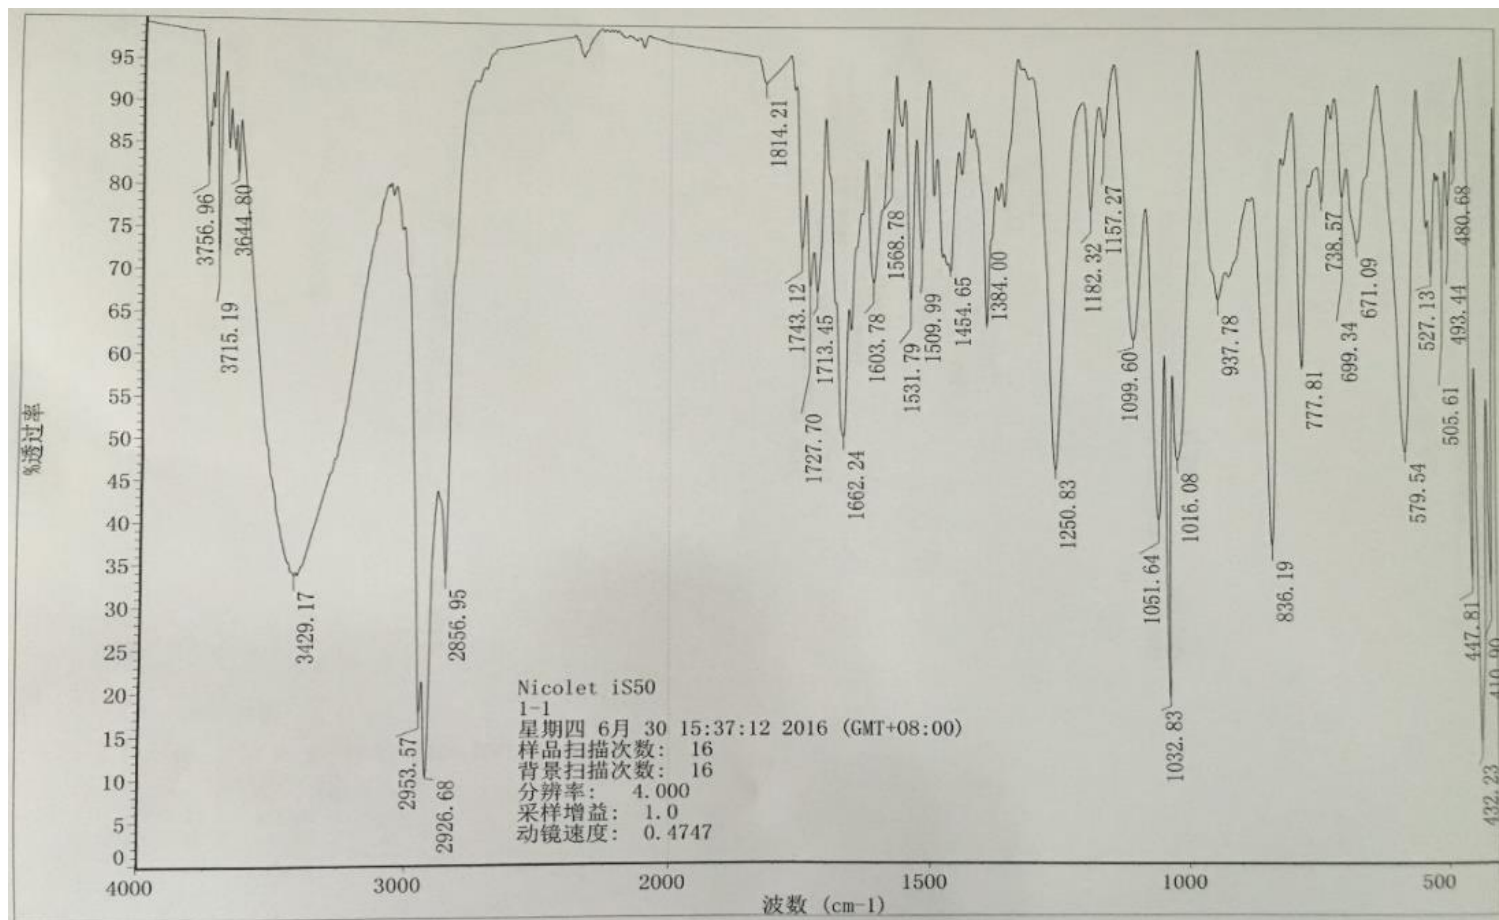

Supplement: marinedrugs-16-00087-s001.pdf [file marinedrugs-16-00087-s001.pdf]
